# Supplementary material for: N-Heterocyclic carbene-catalyzed [3 + 3] annulation of bromoenals with 2-aminochromones to access chromeno[2,3-b]pyridinones
Source: Royal Society of Chemistry journal article supplement (doi:10.1039/d1ob00720c), 2021-01-01
Supplement: d1ob00720c1.pdf [file d1ob00720c1.pdf]

*Supporting Information for*

***N*-Heterocyclic Carbenes-Catalyzed [3+3] Annulation  
of Bromoenals with 2-Aminochromones to Access  
Chromeno[2,3-*b*]pyridinones**

Pengrui Jiang,<sup>a,†</sup> Jingcheng Guo,<sup>a,†</sup> Minghua Gong,<sup>a,†</sup> Xiangui Zhou,<sup>a</sup> Wei Cao,<sup>a</sup>  
Zhenqian Fu<sup>\*,a</sup> and Wei Huang<sup>a</sup>

<sup>a</sup> Key Laboratory of Flexible Electronics & Institute of Advanced Materials, NanJing Tech University, 30 South Puzhu Road, NanJing 211816, China. E-mail: iamzqfu@njtech.edu.cn.

|            |                                                                                                                                                                                                                                                                 |
|------------|-----------------------------------------------------------------------------------------------------------------------------------------------------------------------------------------------------------------------------------------------------------------|
| <b>I</b>   | General information                                                                                                                                                                                                                                             |
| <b>II</b>  | a) Condition optimization (Table S1)<br>b) General procedure for the reactions of <b>1</b> with enlas <b>2</b> to synthesize product <b>3</b><br>c) Synthetic transformations<br>d) Stereochemistry determination <b>3a</b> via X-ray crystallographic analysis |
| <b>III</b> | a) Characterizations of substrates<br>b) Characterizations of products<br>c) References                                                                                                                                                                         |
| <b>IV</b>  | <sup>1</sup> H, <sup>13</sup> C and <sup>19</sup> F NMR spectra of the substrates and products                                                                                                                                                                  |

## **I: General Information**

Commercially available materials purchased from Alfa Aesar or Sigma-Aldrich was used as received. Toluene and DCM was dried over Pure Solv solvent purification system. THF was distilled over sodium. Other solvents were dried over 4Å molecular sieve prior use. Proton nuclear magnetic resonance ( $^1\text{H}$  NMR) spectra were recorded on a Bruker (400 MHz) spectrometer. Chemical shifts were recorded in parts per million (ppm,  $\delta$ ) relative to tetramethylsilane ( $\delta$  0.00) or chloroform ( $\delta$  = 7.26, singlet).  $^1\text{H}$  NMR splitting patterns are designated as singlet (s), doublet (d), triplet (t), quartet (q), dd (doublet of doublets); m (multiplets), and etc. All first-order splitting patterns were assigned on the basis of the appearance of the multiplet. Splitting patterns that could not be easily interpreted are designated as multiplet (m) or broad (br). Carbon nuclear magnetic resonance ( $^{13}\text{C}$  NMR) spectra were recorded on a Bruker (400 MHz) (100 MHz) spectrometer. High resolution mass spectral analysis (HRMS) was performed on a Waters Q-TOF Premier Spectrometer. X-ray crystallography analysis was performed on Bruker X8 APEX X-ray diffractionmeter. Analytical thin-layer chromatography (TLC) was carried out on Merck 60 F254 pre-coated silica gel plate (0.2 mm thickness). Visualization was performed using a UV lamp or potassium permanganate stain.

## II. General procedure

### a) Condition Optimization

**Table S1.** Screening of various reaction conditions for the reaction of **3**

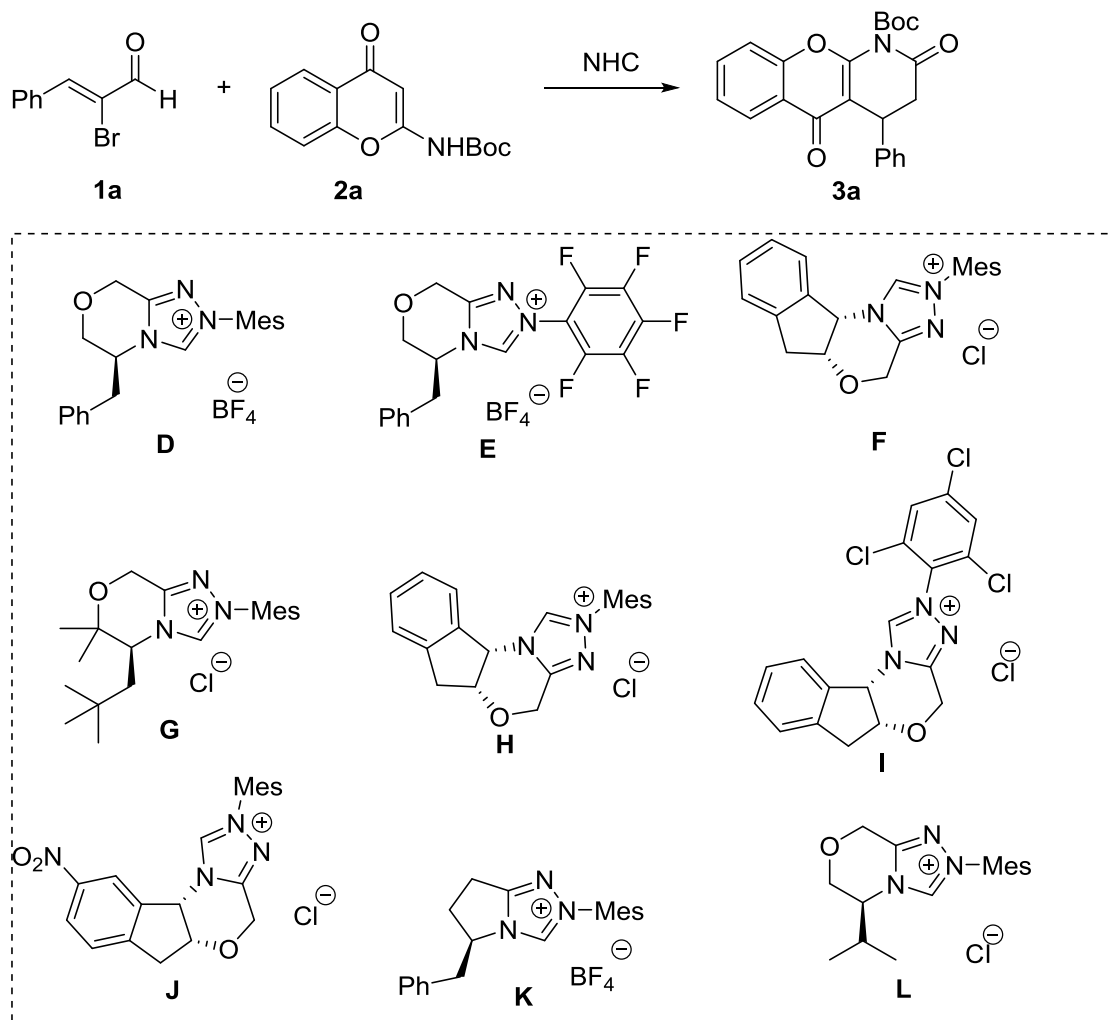

| Entry <sup>[a]</sup> | Base                            | NHC | Solvent            | Yield [%] <sup>[b]</sup> | ee <sup>[c]</sup> |
|----------------------|---------------------------------|-----|--------------------|--------------------------|-------------------|
| 1                    | Cs <sub>2</sub> CO <sub>3</sub> | D   | THF                | 69                       | 32                |
| 2                    | Cs <sub>2</sub> CO <sub>3</sub> | E   | THF                | 71                       | 35                |
| 3                    | Cs <sub>2</sub> CO <sub>3</sub> | F   | THF                | 69                       | 38                |
| 4                    | Cs <sub>2</sub> CO <sub>3</sub> | G   | THF                | 73                       | 40                |
| 6                    | Cs <sub>2</sub> CO <sub>3</sub> | H   | THF                | 75                       | 50                |
| 7                    | Cs <sub>2</sub> CO <sub>3</sub> | I   | THF                | 72                       | 48                |
| 8                    | Cs <sub>2</sub> CO <sub>3</sub> | J   | THF                | 74                       | 49                |
| 9                    | Cs <sub>2</sub> CO <sub>3</sub> | K   | THF                | 72                       | 42                |
| 10                   | Cs <sub>2</sub> CO <sub>3</sub> | L   | THF                | 70                       | 40                |
| 11                   | Cs <sub>2</sub> CO <sub>3</sub> | H   | CH <sub>3</sub> CN | 75                       | 38                |
| 12                   | Cs <sub>2</sub> CO <sub>3</sub> | H   | toluene            | 80                       | 28                |
| 13                   | Cs <sub>2</sub> CO <sub>3</sub> | H   | 1,4-dioxane        | 79                       | 34                |

|                   |                                 |   |               |    |    |
|-------------------|---------------------------------|---|---------------|----|----|
| 14                | Cs <sub>2</sub> CO <sub>3</sub> | H | DCM           | 66 | 42 |
| 15                | Cs <sub>2</sub> CO <sub>3</sub> | H | chlorobenzene | 86 | 31 |
| 16                | K <sub>2</sub> CO <sub>3</sub>  | H | THF           | 80 | 47 |
| 17                | DBU                             | H | THF           | 78 | 42 |
| 18                | Et <sub>3</sub> N               | H | THF           | 76 | 45 |
| 19                | AcONa                           | H | THF           | 74 | 39 |
| 20                | DABCO                           | H | THF           | 86 | 48 |
| 21                | DIPEA                           | H | THF           | 84 | 51 |
| 22 <sup>[d]</sup> | DIPEA                           | H | THF           | 80 | 52 |

<sup>[a]</sup> Standard condition: **2a** (0.1 mmol), **1a** (1.5 equiv), base (2.5 equiv.), NHC precursor (20 mol%), solvent (1.0 ml), 30°C, 12 h. <sup>[b]</sup> Yield (after SiO<sub>2</sub> chromatography purification) were based on **2a**, <sup>[c]</sup> Determined by HPLC. <sup>[d]</sup> 0°C.

**b) General procedure for the reactions of 1 with 2 to synthesize product 3 (3a as an example):**

$\alpha$ -Bromocinnamaldehyde **1** was synthesized according to the literature.<sup>[1]</sup>

Tert-butyl (4-oxo-4H-chromen-2-yl)carbamate **2** were synthesized according to the literature.<sup>[2]</sup>

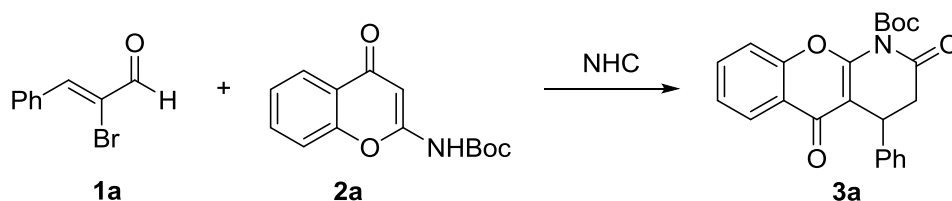

The reaction was operated in a glove box. To a flame-dried screw-capped tube equipped with a magnetic stir bar  $\alpha$ -Bromocinnamaldehyde (31.6 mg, 0.15 mmol), tert-butyl (4-oxo-4H-chromen-2-yl)carbamate **2a** (26.3 mg, 0.10 mmol), DABCO (28.0 mg, 2.5 equiv.), NHC A (5.3 mg, 20 mol%), anhydrous 4 Å MS (100 mg) and PhCl (2.0 mL) were added. The reaction mixture was stirred at 30°C until tert-butyl (4-oxo-4H-chromen-2-yl)carbamate **2a** disappeared (detected by TLC), and then directly applied to silica gel column chromatography (25% v/v ethyl acetate in hexane) to afford **3a** as a white solid in 88% yield.

**c) Synthetic transformations**

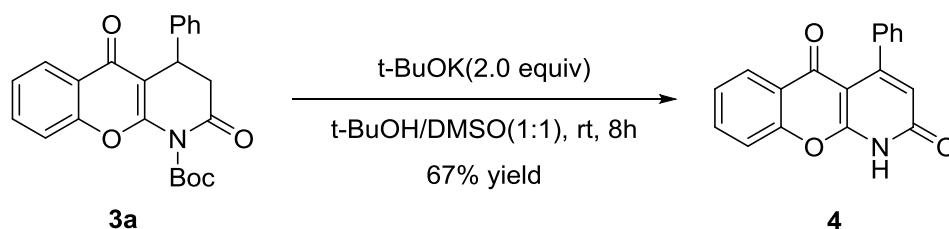

The reaction was operated in a glove box. To a flame-dried screw-capped tube equipped with a magnetic stir bar **3a** (39.1 mg, 0.1 mmol), t-BuOK (22.4 mg, 2.0 equiv), the mixture of solvents (t-BuOH: DMSO = 1:1, 2.0 mL) was added. The reaction mixture was stirred at room temperature. After the completion of reaction, the solvent was concentrated under reduced pressure, and the crude residue was

purified by flash chromatography (5% v/v methanol in DCM) to afford **4** as a white solid in 67% yield.

**d) Stereochemistry determination 3a via X-ray crystallographic analysis**

Product **3a** was crystallized as a colorless crystal *via* vaporization of a hexane/ethyl acetate solution, and its relative configuration was determined by x-ray structure analysis. CCDC 2081889 contains the supplementary crystallographic data that can be obtained free of charge from The Cambridge Crystallographic Data Centre via [www.ccdc.cam.ac.uk/data request/cif](http://www.ccdc.cam.ac.uk/data_request/cif).

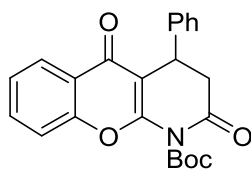

**3a**

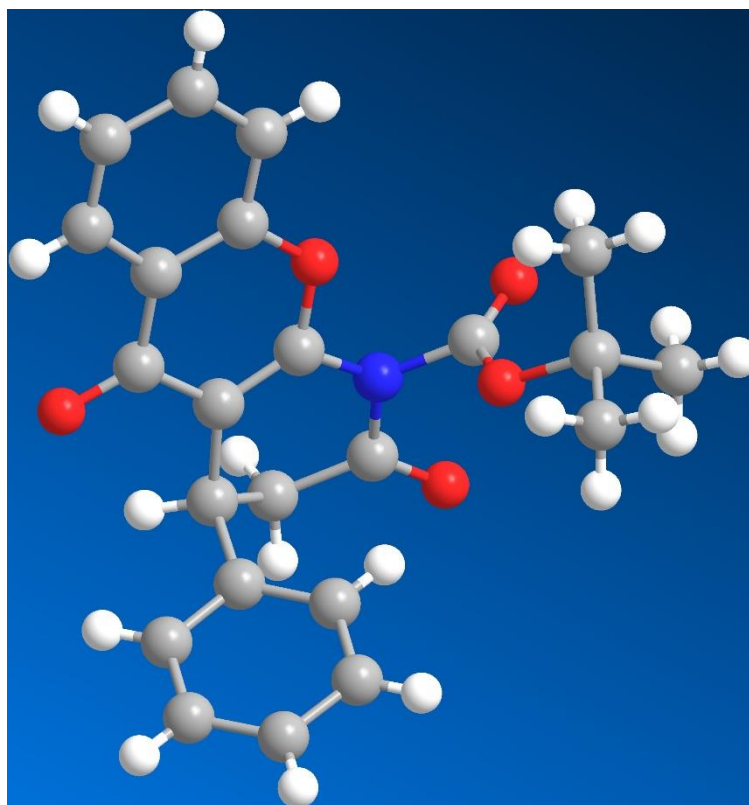

### III. Characterizations of products, reference

#### a) Characterizations of Products

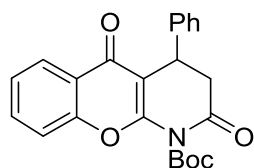

**3a**

**Tert-butyl 2,5-dioxo-4-phenyl-3,4-dihydro-2H-chromeno[2,3-b]pyridine-1(5H)-carboxylate (3a):** white solid; mp 110.4-111.8°C;  $^1\text{H}$  NMR (400 MHz,  $\text{CDCl}_3$ )  $\delta$  = 8.18 (dd,  $J$  = 8.0, 2.0 Hz, 1H), 7.68-7.63(m, 1H), 7.44-7.40 (m, 1H), 7.35 (dd,  $J$  = 8.4, 2.4Hz, 1H), 7.31-7.20(m, 4H), 6.95 (t,  $J$  = 8.8Hz, 1H), 4.64 (t,  $J$  = 7.2, 1H), 3.12-3.06 (m, 1H), 2.98-2.90 (m, 1H), 1.64 (s, 9H);  $^{13}\text{C}$  NMR (100 MHz,  $\text{CDCl}_3$ )  $\delta$  = 172.5, 167.4, 165.9, 153.9, 153.1, 146.7, 139.4, 135.8, 133.8, 133.7, 129.1, 128.5, 128.4, 127.6, 126.8, 126.3, 126.0, 125.90, 123.2, 117.4, 117.3, 116.1, 115.8, 87.3, 87.1, 38.7, 38.7, 32.8, 32.2, 23.9; FTIR ( $\text{cm}^{-1}$ : KBr): 2910, 2837, 1658, 1523, 1436, 1395, 1330, 1290, 1229, 1006, 958, 849, 772; HRMS(ESI) calcd for  $\text{C}_{23}\text{H}_{22}\text{NO}_5^+(\text{M}+\text{H})^+$ : 392.1492, Found: 392.1494. 52 *ee* as determined by HPLC (Chiralcel ADH, 90:10 hexanes/*i*-PrOH, 1.0 mL/min),  $t_r$  (major) = 18.9 min,  $t_r$  (minor) = 32.0 min.

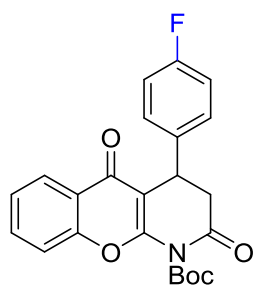

**3b**

**Tert-butyl 4-(4-fluorophenyl)-2,5-dioxo-3,4-dihydro-2H-chromeno[2,3-b]pyridine-1(5H)-carboxylate (3b) :** white solid; mp 124.4-125.8°C;  $^1\text{H}$  NMR (400 MHz,  $\text{CDCl}_3$ )  $\delta$  = 8.19 (dd,  $J$  = 8.0, 2.0 Hz, 1H), 7.69-7.65 (m, 1H, 7.46-7.42(m, 1H), 7.37(d,  $J$  = 8.0 Hz, 1H), 7.30-7.27 (m, 2H), 7.00-6.94 (m, 2H), 4.65 (dd,  $J$  = 7.6, 1.6 Hz, 1H), 3.11(dd,  $J$  = 16.0, 7.6 Hz, 1H), 2.94 (dd,  $J$  = 16.0, 1.6 Hz, 1H), 1.66 (s, 9H);

$^{13}\text{C}$  NMR (100 MHz,  $\text{CDCl}_3$ )  $\delta$  = 174.7, 167.2, 163.4, 160.9, 153.9, 153.7, 147.4, 136.2, 136.2, 133.7, 128.5, 128.4, 126.3, 125.9, 122.7, 117.3, 116.0, 115.8, 103.8, 87.3, 38.7, 32.2, 27.6;  $^{19}\text{F}$  NMR (376 MHz,  $\text{CDCl}_3$ )  $\delta$  = -115.06; FTIR ( $\text{cm}^{-1}$ : KBr): 2359, 2341, 2057, 1785, 1720, 1636, 1509, 1465, 1409, 1245, 1139, 760; HRMS(ESI) calcd for  $\text{C}_{23}\text{H}_{21}\text{FNO}_5^+(\text{M}+\text{H})^+$ : 410.1398, Found: 410.1396.

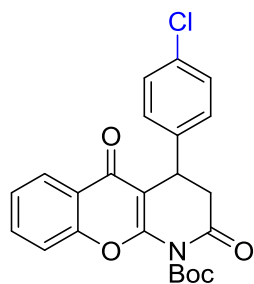

**3c**

**Tert-butyl 4-(4-chlorophenyl)-2,5-dioxo-3,4-dihydro-2H-chromeno[2,3-b]pyridine -1(5H)-carboxylate (3c):** white solid; mp 136.8-137.9°C;  $^1\text{H}$  NMR (400 MHz,  $\text{CDCl}_3$ )  $\delta$  = 8.18 (dd,  $J$  = 7.6, 1.6 Hz, 1H), 7.68-7.64 (m, 1H), 7.43 (t,  $J$  = 8.0 Hz, 1H), 7.35 (dd,  $J$  = 8.4, 1.2 Hz, 1H), 7.23 (s, 4H), 4.62 (dd,  $J$  = 7.6, 1.6 Hz, 1H), 3.14 (dd,  $J$  = 16.0, 4.0 Hz, 1H), 2.92 (dd,  $J$  = 16.0, 1.6 Hz, 1H), 1.64 (s, 9H);  $^{13}\text{C}$  NMR (100 MHz,  $\text{CDCl}_3$ )  $\delta$  = 173.4, 163.6, 153.9, 148.6, 138.9, 132.8, 132.6, 130.8, 129.2, 128.2, 126.3, 126.0, 123.1, 121.8, 117.3, 104.6, 85.3, 39.1, 30.9, 25.9; FTIR ( $\text{cm}^{-1}$ : KBr): 2980, 2924, 2853, 1785, 1723, 1635, 1574, 1465, 1420, 1245, 1140, 840, 759; HRMS(ESI) calcd for  $\text{C}_{23}\text{H}_{21}\text{ClNO}_5^+(\text{M}+\text{H})^+$ : 426.1103, Found: 426.1100.

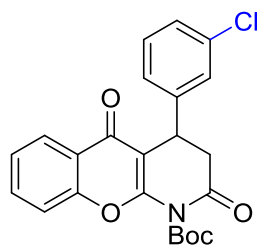

**3d**

**Tert-butyl 4-(3-chlorophenyl)-2,5-dioxo-3,4-dihydro-2H-chromeno[2,3-b]pyridine -1(5H)-carboxylate (3d):** white solid; mp 216.1-216.4°C;  $^1\text{H}$  NMR (400

MHz, CDCl<sub>3</sub>)  $\delta$  = 8.18 (dd,  $J$  = 8.0, 2.0 Hz, 1H), 7.43 (t,  $J$  = 7.6 Hz, 1H), 7.37(d,  $J$  = 9.6 Hz 1H), 7.26 (t,  $J$  = 2.0 Hz, 1H), 7.22-7.18 (m, 3H), 4.62 (dd,  $J$  = 7.6, 1.6 Hz, 1H), 3.09 (dd,  $J$  = 16.0, 7.6 Hz, 1H), 2.92 (dd,  $J$  = 16.0, 2.0 Hz, 1H), 1.64 (s, 9H); <sup>13</sup>C NMR (100 MHz, CDCl<sub>3</sub>)  $\delta$  = 174.6, 166.8, 153.9, 146.7, 142.3, 136.1, 133.9, 130.4, 129.1, 127.9, 126.9, 126.3, 126.0, 125.2, 123.1, 102.8, 87.4, 37.9, 31.9, 27.7; FTIR (cm<sup>-1</sup>: KBr): 2773, 2050, 1785, 1632, 1497, 1464, 1412, 1253, 1141, 758; HRMS(ESI) calcd for C<sub>23</sub>H<sub>21</sub>ClNO<sub>5</sub><sup>+</sup>(M+H)<sup>+</sup>: 426.1103, Found: 426.1111.

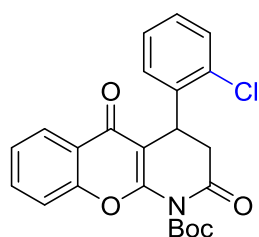

**3e**

**Tert-butyl 4-(2-chlorophenyl)-2,5-dioxo-3,4-dihydro-2H-chromeno[2,3-b]pyridine -1(5H)-carboxylate (3e):** white solid; mp 144.1-150.5°C; <sup>1</sup>H NMR (400 MHz, CDCl<sub>3</sub>)  $\delta$  = 8.16 (dd,  $J$  = 8.0, 1.6 Hz, 1H), 7.70-7.66 (m, 1H), 7.58 (dd,  $J$  = 8.0, 1.6 Hz, 1H), 7.42 (dd,  $J$  = 14.0, 7.6 Hz, 2H), 7.15 (t,  $J$  = 6.4 Hz, 1H), 7.08 (dd,  $J$  = 8.0, 2.0 Hz, 1H), 7.06-7.03 (m, 1H), 5.04 (dd,  $J$  = 7.6, 2.0 Hz, 1H), 3.06 (dd,  $J$  = 16.0, 7.6 Hz, 1H), 2.97 (dd,  $J$  = 16.0, 2.0 Hz, 1H), 1.66 (s, 9H); <sup>13</sup>C NMR (100 MHz, CDCl<sub>3</sub>)  $\delta$  = 174.5, 167.2, 156.2, 154.1, 147.5, 138.6, 133.9, 129.2, 128.1, 127.0, 126.3, 125.5, 124.3, 123.1, 117.4, 104.2, 85.6, 37.8, 31.8, 27.7; FTIR (cm<sup>-1</sup>: KBr): 2982, 2927, 2049, 1786, 1720, 1636, 1465, 1414, 1331, 1245, 1138, 756; HRMS(ESI) calcd for C<sub>23</sub>H<sub>21</sub>ClNO<sub>5</sub><sup>+</sup>(M+H)<sup>+</sup>: 426.1103, Found: 426.1108.

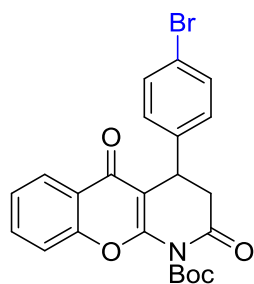

**3f**



**Tert-butyl 4-(4-bromophenyl)-2,5-dioxo-3,4-dihydro-2H-chromeno[2,3-b]pyridine-1(5H)-carboxylate (3f):** white solid; mp 171.3-172.5 °C; <sup>1</sup>H NMR (400 MHz, CDCl<sub>3</sub>) δ = 8.18 (dd, *J* = 8.0, 1.6 Hz, 1H), 7.68-7.64 (m, 1H), 7.45-7.34 (m, 4H), 7.18 (d, *J* = 8.4 Hz, 2H), 4.61 (dd, *J* = 8.0, 1.6 Hz, 1H), 3.19 (dd, *J* = 16.4, 8.0 Hz, 1H), 2.92 (dd, *J* = 16.0, 2.0 Hz, 1H), 1.64 (s, 9H); <sup>13</sup>C NMR (100 MHz, CDCl<sub>3</sub>) δ = 175.3, 166.4, 153.9, 153.5, 146.5, 139.5, 134.2, 132.2, 128.6, 126.3, 124.9, 123.1, 119.9, 117.4, 102.1, 88.3, 85.2, 38.4, 32.4, 27.6; FTIR (cm<sup>-1</sup>: KBr): 2931, 2858, 1734, 1560, 1491, 1255, 1149, 1008, 881, 765; HRMS(ESI) calcd for C<sub>23</sub>H<sub>21</sub>BrNO<sub>5</sub><sup>+</sup> (M+H)<sup>+</sup>: 470.0598, Found: 470.0601.

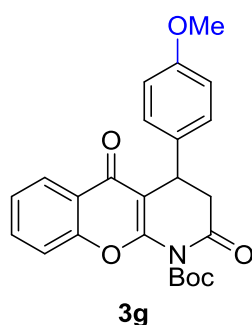

**Tert-butyl 4-(4-methoxyphenyl)-2,5-dioxo-3,4-dihydro-2H-chromeno[2,3-b] pyridine-1(5H)-carboxylate (3g):** white solid; mp 141.5-142.2 °C; <sup>1</sup>H NMR (400 MHz, CDCl<sub>3</sub>) δ = 8.17 (dd, *J* = 8.4, 2.0 Hz, 1H), 7.66-7.62 (m, 1H), 7.42 (t, *J* = 1.2 Hz, 1H), 7.35 (d, *J* = 14.0 Hz, 1H), 7.20 (s, 1H), 6.98 (s, 1H), 6.79 (m, 2H), 4.60 (d, *J* = 9.2 Hz, 1H), 3.73 (s, 3H), 3.06 (dd, *J* = 16.0, 6.0 Hz, 1H), 2.92 (dd, *J* = 16.0, 2.0 Hz, 1H), 1.64 (s, 9H); <sup>13</sup>C NMR (100 MHz, CDCl<sub>3</sub>) δ = 174.1, 167.0, 159.5, 152.9, 134.6, 132.2, 129.8, 129.2, 127.2, 126.3, 125.9, 122.5, 116.9, 114.0, 104.2, 54.8, 37.9, 32.1, 28.5; FTIR (cm<sup>-1</sup>: KBr): 2981, 2933, 2837, 1785, 1720, 1636, 1574, 1512, 1465, 1411, 1371, 1247, 1140, 1031, 840, 760; HRMS(ESI) calcd for C<sub>24</sub>H<sub>24</sub>NO<sub>6</sub><sup>+</sup> (M+H)<sup>+</sup>: 422.1598, Found: 422.1593.

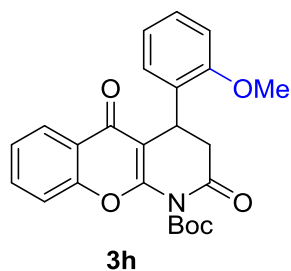

**Tert-butyl 4-(2-methoxyphenyl)-2,5-dioxo-3,4-dihydro-2H-chromeno[2,3-b]pyridine-1(5H)-carboxylate (3h):** white solid; mp 160.6-160.9°C; <sup>1</sup>H NMR (400 MHz, CDCl<sub>3</sub>) δ = 8.12 (dd, *J* = 7.6, 1.6 Hz, 1H), 7.64-7.59 (m, 1H), 7.39 (t, *J* = 4.2 Hz, 1H), 7.33-7.30 (m, 2H), 7.20-7.16 (m, 1H), 6.87-6.80 (m, 2H), 4.70 (d, *J* = 9.2 Hz, 1H), 3.78 (s, 3H), 3.04 (dd, *J* = 16.4, 9.2 Hz, 1H), 2.87 (dd, *J* = 16.8, 1.6 Hz, 1H), 1.67 (s, 9H); <sup>13</sup>C NMR (100 MHz, CDCl<sub>3</sub>) δ = 175.6, 167.5, 156.4, 153.2, 148.1, 132.9, 129.7, 128.7, 128.3, 126.2, 125.6, 122.8, 120.5, 117.3, 110.6, 101.4, 86.7, 54.7, 35.8, 29.7, 27.7; FTIR (cm<sup>-1</sup>: KBr): 2980, 2937, 2838, 1781, 1721, 1634, 1574, 1465, 1414, 1331, 1244, 1140, 1030, 841, 753; HRMS(ESI) calcd for C<sub>24</sub>H<sub>24</sub>NO<sub>6</sub><sup>+</sup>(M+H)<sup>+</sup>: 422.1598, Found: 422.1590.

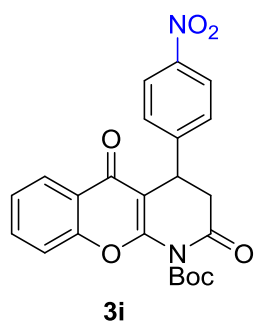

**Tert-butyl 4-(4-nitrophenyl)-2,5-dioxo-3,4-dihydro-2H-chromeno[2,3-b]pyridine-1(5H)-carboxylate (3i):** white solid; mp 173.5-175.2°C; <sup>1</sup>H NMR(400 MHz, CDCl<sub>3</sub>) δ = 8.16(m, 3H), 7.68 (m, 1H), 7.47 (m, 1H), 7.37 (d, *J* = 8.4 Hz, 1H), 4.74 (d, *J* = 8.0 Hz, 1H), 3.16 (dd, *J* = 16.4, 8.0 Hz, 1H), 2.97 (dd, *J* = 16.4, 2.0 Hz, 1H), 1.65 (s, 9H); <sup>13</sup>C NMR (100 MHz, CDCl<sub>3</sub>) δ = 185.8, 173.4, 166.7, 153.3, 148.3, 137.9, 134.0, 132.8, 127.5, 126.3, 126.0, 125.3, 124.4, 117.4, 116.9, 101.9, 94.3, 87.7, 37.9, 32.4, 28.1, 27.6; FTIR (cm<sup>-1</sup>: KBr): 2052, 1636, 1527, 1246, 1138, 513; HRMS(ESI) calcd for C<sub>23</sub>H<sub>21</sub>N<sub>2</sub>O<sub>7</sub><sup>+</sup>(M+H)<sup>+</sup>: 437.1343, Found: 437.1349.

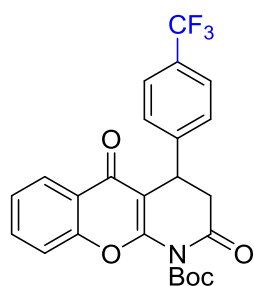

**3j**

**Tert-butyl 2,5-dioxo-4-(4-(trifluoromethyl)phenyl)-3,4-dihydro-2H-chromeno[2,3-b]pyridine-1(5H)-carboxylate(3j):** white solid; mp 132.6-133.9°C; <sup>1</sup>H NMR(400 MHz, CDCl<sub>3</sub>) δ = 8.18 (dd, *J* = 8.0, 1.6 Hz, 1H), 7.70-7.65(m, 1H), 7.54 (d, *J* = 8.0 Hz, 2H), 7.45-7.42 (m, 3H), 7.37 (d, *J* = 7.6 Hz, 1H), 4.71 (d, *J* = 9.2 Hz, 1H), 3.14 (dd, *J* = 16.4, 8.0 Hz, 1H), 2.95 (dd, *J* = 16.0, 1.6 Hz, 1H), 1.65 (s, 9H); <sup>13</sup>C NMR (100 MHz, CDCl<sub>3</sub>) δ = 175.3, 166.8, 153.9, 153.9, 147.3, 144.5, 133.9, 127.3, 126.3, 126.1, 126.1, 124.9, 122.3, 117.4, 103.1, 87.4, 38.3, 32.8, 28.4; <sup>19</sup>F NMR (376 MHz, CDCl<sub>3</sub>) δ = -62.53; FTIR (cm<sup>-1</sup>: KBr): 2983, 2930., 2854, 1787, 1724, 1635, 1574, 1466, 1412, 1372, 1326 1246, 1139, 1068, 1016, 840, 760; HRMS(ESI) calcd for C<sub>24</sub>H<sub>20</sub>NNaO<sub>5</sub><sup>+</sup>(M+Na)<sup>+</sup>: 482.1186, Found: 482.1194.

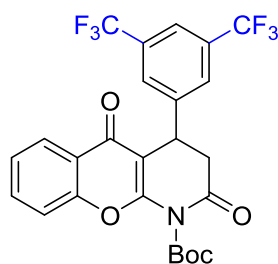

**3k**

**Tert-butyl 4-(3,5-bis(trifluoromethyl)phenyl)-2,5-dioxo-3,4-dihydro-2H-chromeno [2,3-b]pyridine-1(5H)-carboxylate(3k):** yellow solid; mp 152.5-154.8°C; <sup>1</sup>H NMR (400 MHz, CDCl<sub>3</sub>) δ = 8.18 (dd, *J* = 8.0, 1.6 Hz, 1H), 7.75-7.68 (m, 4H), 7.46 (t, *J* = 7.2 Hz, 1H), 7.40 (d, *J* = 4.4 Hz, 1H), 4.76 (dd, *J* = 8.0, 2.0 Hz, 1H), 3.17 (dd, *J* = 16.0, 7.6 Hz, 1H), 2.92 (dd, *J* = 16.0, 1.6 Hz, 1H), 1.64 (s, 9H); <sup>13</sup>C NMR (100 MHz, CDCl<sub>3</sub>) δ = 174.3, 166.0, 154.3, 154.0, 146.7, 142.9, 134.1, 132.6, 131.9,

127.2, 126.3, 126.3, 123.0, 121.3, 118.0, 102.6, 87.8, 37.6, 31.8, 27.5;  $^{19}\text{F}$  NMR (376 MHz,  $\text{CDCl}_3$ )  $\delta = -62.72$ ; FTIR ( $\text{cm}^{-1}$ : KBr): 2985, 2914, 1792, 1726, 1636, 1574, 1466, 1416, 1373, 1279, 1134, 896, 839, 760; HRMS(ESI) calcd for  $\text{C}_{25}\text{H}_{28}\text{F}_7\text{NO}_5^+(\text{M}+\text{Na})^+$ : 550.1060, Found: 550.1069.

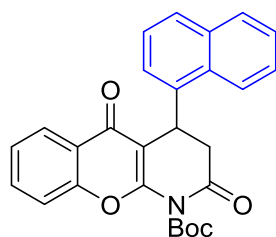

**3l**

**Tert-butyl 4-(naphthalen-1-yl)-2,5-dioxo-3,4-dihydro-2H-chromeno[2,3-b] pyridine-1(5H)-carboxylate (3l):** white solid; mp 142.1-143.8°C;  $^1\text{H}$  NMR (400 MHz,  $\text{CDCl}_3$ )  $\delta = 8.20$  (dd,  $J = 8.0, 1.6$  Hz, 1H), 7.78-7.73 (m, 3H), 7.70-7.66 (m, 2H), 7.47 (dd,  $J = 8.4, 2.0$  Hz, 1H), 7.44-7.38 (m, 4H), 4.83 (dd,  $J = 7.6, 2.0$  Hz, 1H), 3.17 (dd,  $J = 16.0, 7.6$  Hz, 1H), 1.67 (s, 9H);  $^{13}\text{C}$  NMR (100 MHz,  $\text{CDCl}_3$ )  $\delta = 174.8, 167.3, 157.5, 147.1, 138.2, 133.7, 133.5, 132.8, 129.1, 128.0, 127.6, 126.3, 126.3, 126.0, 125.9, 125.4, 125.1, 123.2, 116.8, 103.3, 85.6, 37.9, 32.9, 27.7, 23.7$ ; FTIR ( $\text{cm}^{-1}$ : KBr): 2979, 2915, 2848, 1786, 1722, 1635, 1573, 1465 1414, 1246, 1138, 840, 759; HRMS(ESI) calcd for  $\text{C}_{27}\text{H}_{24}\text{NO}_5^+(\text{M}+\text{H})^+$ : 442.1649, Found: 442.1655.

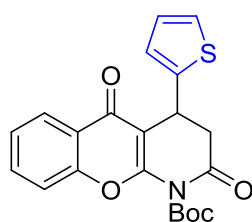

**3m**

**Tert-butyl 2,5-dioxo-4-(thiophen-2-yl)-3,4-dihydro-2H-chromeno[2,3-b] pyridine-1(5H)-carboxylate (3m):** white solid; mp 281.2-283.0°C;  $^1\text{H}$  NMR (400 MHz,  $\text{CDCl}_3$ )  $\delta = 8.21$  (dd,  $J = 8.0, 2.0$  Hz, 1H), 7.67-7.63 (m, 1H), 7.43 (m, 1H), 7.45-7.41 (m, 1H), 7.34 (d,  $J = 9.2$  Hz, 1H), 7.28 (dd,  $J = 1.6, 0.8$  Hz, 1H), 6.22 (dd,  $J = 3.6,$

2.0 Hz, 1H), 6.13 (d,  $J = 3.2$  Hz, 1H), 4.71 (dd,  $J = 7.6, 1.6$  Hz, 1H), 3.06 (dd,  $J = 16.0, 2.0$  Hz, 1H), 2.96 (dd,  $J = 16.0, 6.8$  Hz, 1H), 1.63 (s, 9H);  $^{13}\text{C}$  NMR (100 MHz,  $\text{CDCl}_3$ )  $\delta = 175.0, 165.8, 153.9, 152.0, 147.8, 142.5, 135.6, 127.9, 124.8, 122.3, 116.5, 110.4, 105.6, 100.3, 88.8, 37.3, 28.4, 27.1$ ; FTIR ( $\text{cm}^{-1}$ : KBr): 2979, 2914, 2847, 1781, 1723, 1635, 1571, 1465, 1417, 1331, 1266, 1141, 1007, 840, 759; HRMS(ESI) calcd for  $\text{C}_{21}\text{H}_{20}\text{NO}_5\text{S}^+$  ( $\text{M}+\text{H}$ ) $^+$ : 398.1057, Found: 398.1064.

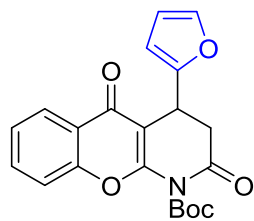

**3n**

**Tert-butyl 4-(furan-2-yl)-2,5-dioxo-3,4-dihydro-2H-chromeno[2,3-b] pyridine-1(5H)-carboxylate(3n)**: white solid; mp 120.5-122.1 $^{\circ}\text{C}$ ;  $^1\text{H}$  NMR (400 MHz,  $\text{CDCl}_3$ )  $\delta = 8.21$  (dd,  $J = 8.0, 2.0$  Hz, 1H), 7.65 (m, 1H), 7.43 (m, 1H), 7.34 (d,  $J = 8.4$  Hz, 1H), 7.29 (dd,  $J = 2.0, 0.8$  Hz, 1H), 6.22 (dd,  $J = 3.2, 2.0$  Hz, 1H), 6.13 (m, 1H), 4.71 (dd,  $J = 7.2, 2.0$  Hz, 1H), 3.07 (dd,  $J = 16.0, 4.0$  Hz, 1H), 2.96 (dd,  $J = 16.0, 6.8$  Hz, 1H), 1.64(s, 9H);  $^{13}\text{C}$  NMR (100 MHz,  $\text{CDCl}_3$ )  $\delta = 175.1, 166.2, 154.3, 152.7, 142.5, 133.0, 126.3, 125.3, 117.3, 110.4, 105.6, 86.4, 36.2, 27.7, 27.1$ ; FTIR ( $\text{cm}^{-1}$ : KBr): 2982, 2927, 1783, 1725, 1636, 1573, 1465, 1417, 1371, 1330, 1247, 1141, 1011, 886, 759; HRMS(ESI) calcd for  $\text{C}_{21}\text{H}_{20}\text{NO}_6^+$  ( $\text{M}+\text{H}$ ) $^+$ : 382.1285, Found: 382.1288.

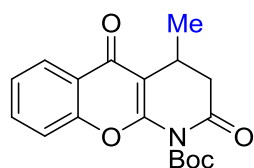

**3o**

**Tert-butyl 4-methyl-2,5-dioxo-3,4-dihydro-2H-chromeno[2,3-b] pyridine-1(5H)-carboxylate (3o)**: white solid; mp 101.2-103.8 $^{\circ}\text{C}$ ;  $^1\text{H}$  NMR (400 MHz,  $\text{CDCl}_3$ )  $\delta = 8.21$  (dd,  $J = 8.0, 2.0$  Hz, 1H), 7.64 (t,  $J = 6.8$  Hz, 1H), 7.42(t,  $J = 6.8$  Hz, 1H), 7.32 (d,  $J = 8.4$  Hz, 1H), 3.51 (t,  $J = 7.2$  Hz, 1H), 2.80 (dd,  $J = 15.6, 6.8$  Hz, 1H), 2.59 (dd,  $J = 15.6, 6.8$  Hz, 1H), 1.63 (s, 9H), 1.19 (d,  $J = 7.2$  Hz, 3H);  $^{13}\text{C}$  NMR (100 MHz,

CDCl<sub>3</sub>)  $\delta$  = 175.0, 167.5, 153.8, 151.6, 146.8, 133.5, 126.9, 125.2, 123.2, 116.8, 104.7, 89.3, 37.2, 28.4, 22.0, 17.6; FTIR (cm<sup>-1</sup>: KBr): 2930, 2029, 1781, 1635, 1465, 1415, 1270, 1250, 1140, 758; HRMS(ESI) calcd for C<sub>18</sub>H<sub>20</sub>NO<sub>5</sub><sup>+</sup>(M+H)<sup>+</sup>: 330.1336, Found: 330.1333.

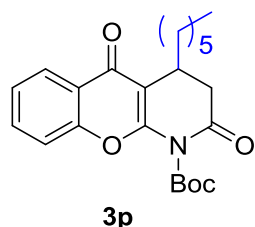

**Tert-butyl 4-hexyl-2,5-dioxo-3,4-dihydro-2H-chromeno[2,3-b]pyridine-1(5H)-carboxylate(3p):** yellow oil; <sup>1</sup>H NMR (400 MHz, CDCl<sub>3</sub>)  $\delta$  = 8.20 (dd,  $J$  = 8.0, 2.0 Hz, 1H), 7.66-7.62 (m, 1H), 7.45-7.41 (m, 1H), 7.33 (dd,  $J$  = 8.4, 0.8 Hz, 1H), 3.42-3.36 (m, 1H), 2.72(d,  $J$  = 4.4 Hz, 2H), 1.63 (s, 9H), 1.29-1.23 (m, 10H), 0.84 (t,  $J$  = 6.8 Hz, 3H); <sup>13</sup>C NMR (100 MHz, CDCl<sub>3</sub>)  $\delta$  = 175.6, 168.2, 154.1, 153.0, 133.5, 126.2, 125.7, 123.2, 117.3, 105.4, 86.8, 36.3, 33.1, 31.8, 29.9, 29.3, 28.1, 27.6, 26.4, 22.7, 14.2; FTIR (cm<sup>-1</sup>: KBr): 2051, 1636, 1413. 1245, 1141, 759; HRMS(ESI) calcd for C<sub>18</sub>H<sub>20</sub>NO<sub>5</sub><sup>+</sup>(M+H): 330.1336, Found: 330.1333.

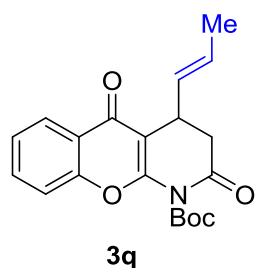

**Tert-butyl (Z)-2,5-dioxo-4-(prop-1-en-1-yl)-3,4-dihydro-2H-chromeno[2,3-b]pyridine-1(5H)-carboxylate(3q):** yellow oil; <sup>1</sup>H NMR (400 MHz, CDCl<sub>3</sub>)  $\delta$  = 8.23 (dd,  $J$  = 8.0, 1.6 Hz, 1H), 7.68-7.64 (m, 1H), 7.46-7.42 (m, 1H), 7.35 (dd,  $J$  = 8.4, 1.2 Hz, 1H), 5.65-5.56 (m, 1H), 5.50-5.43 (m, 1H), 4.04-4.00 (m, 1H), 2.85-2.75 (m, 2H), 1.64-1.63 (m, 12H); <sup>13</sup>C NMR (100 MHz, CDCl<sub>3</sub>)  $\delta$  = 175.3, 167.7, 153.9, 152.9, 147.6, 133.5, 127.9, 126.9, 126.2, 125.8, 123.2, 117.3, 103.6, 86.8, 37.1, 29.8, 27.7, 17.9; FTIR (cm<sup>-1</sup>: KBr): 2979, 2917, 2854, 1784, 1724, 1635, 1573, 1465, 1416, 1371,

1327, 1245, 1140, 959, 842, 759; HRMS(ESI) calcd for  $C_{20}H_{22}NO_5^+(M+H)$ : 356.1492, Found: 356.1490.

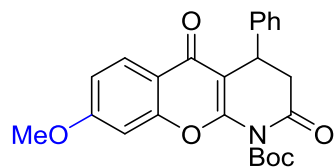

**3r**

**Tert-butyl 7-methoxy-2,5-dioxo-4-phenyl-3,4-dihydro-2H-chromeno[2,3-b] pyridine-1(5H)-carboxylate (3r):** white solid; mp 103.1-116.8°C;  $^1H$  NMR (400 MHz,  $CDCl_3$ )  $\delta$  = 8.10 (d,  $J$  = 8.8 Hz, 1H), 7.33-7.28 (m, 4H), 7.23-7.20 (m, 1H), 6.98 (dd,  $J$  = 8.8, 2.4 Hz, 1H), 6.74 (d,  $J$  = 2.4 Hz, 1H), 4.64 (d,  $J$  = 6.8 Hz, 1H), 3.91 (s, 3H), 3.09 (dd,  $J$  = 16.0, 7.6 Hz, 1H), 2.96 (d,  $J$  = 11.6 Hz, 1H), 1.65 (s, 9H);  $^{13}C$  NMR (100MHz,  $CDCl_3$ )  $\delta$  = 174.70, 167.10, 157.33, 154.47, 148.08, 133.37, 130.36, 128.76, 128.32, 126.19, 125.66, 123.70, 120.52, 117.21, 111.49, 102.93, 86.71, 57.79, 36.97, 31.72, 29.21; FTIR ( $cm^{-1}$ : KBr): 2922, 2851, 1785, 1560, 1409, 1273, 1241, 1136, 930; HRMS(ESI) calcd for  $C_{24}H_{24}NO_6 (M+H)^+$ : 422.1598, Found: 422.1595.

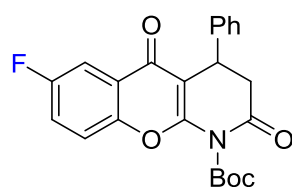

**3s**

**Tert-butyl 7-fluoro-2,5-dioxo-4-phenyl-3,4-dihydro-2H-chromeno[2,3-b]pyridine-1(5H)-carboxylate(3s):** white solid; mp 193.5-195.4°C;  $^1H$  NMR (400 MHz,  $CDCl_3$ )  $\delta$  = 7.84-7.81 (m, 1H), 7.38-7.36 (m, 1H), 7.31-7.28 (m, 4H), 7.24-7.20 (m, 1H), 4.65 (dd,  $J$  = 7.6, 1.6 Hz, 1H), 3.11 (dd,  $J$  = 16.0, 7.6 Hz, 1H), 2.97 (dd,  $J$  = 16.0, 1.6 Hz, 1H), 1.65 (s, 9H);  $^{13}C$  NMR (100 MHz,  $CDCl_3$ )  $\delta$  = 183.7, 166.6, 161.2, 157.1, 153.4, 149.0, 146.0, 139.0, 129.2, 127.7, 126.8, 124.6, 124.5, 122.2, 121.5, 119.4, 119.3, 112.4, 111.4, 101.7, 86.5, 37.7, 32.9, 27.7;  $^{19}F$  NMR (376 MHz,  $CDCl_3$ )  $\delta$  = -114.03; FTIR ( $cm^{-1}$ : KBr): 2981, 2916, 1788, 1725, 1633, 1583, 1478, 1456, 1406, 1372,

1248, 1197, 1139, 1019, 822, 785; HRMS(ESI) calcd for  $C_{23}H_{21}FNO_5^+(M+H)$ : 410.1398, Found: 410.1395.

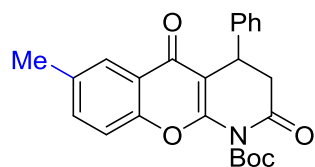

**3t**

**Tert-butyl 7-methoxy-2,5-dioxo-4-phenyl-3,4-dihydro-2H-chromeno[2,3-b]pyridine-1(5H)-carboxylate(3t)** : white solid; mp 102.1-118.6°C;  $^1H$  NMR (400 MHz,  $CDCl_3$ )  $\delta$  = 7.96 (d,  $J$  = 2.8 Hz, 1H), 7.45 (dd,  $J$  = 8.4, 2.0 Hz, 1H), 7.31-7.20 (m, 3H), 7.25-7.23 (m, 2H), 7.22-7.18 (m, 1H), 4.64 (dd,  $J$  = 7.6, 1.6 Hz, 1H), 3.09 (dd,  $J$  = 16.0, 7.6 Hz, 1H), 2.97 (dd,  $J$  = 16.0, 2.0 Hz, 1H), 2.43 (s, 3H), 1.64 (s, 9H);  $^{13}C$  NMR (100 MHz,  $CDCl_3$ )  $\delta$  = 173.3, 166.4, 154.7, 151.1, 146.3, 140.5, 136.4, 134.7, 129.0, 127.5, 126.7, 125.3, 121.8, 116.6, 103.4, 85.3, 38.6, 32.4, 27.0, 21.0; FTIR ( $cm^{-1}$ : KBr): 2921, 2849, 1786, 1724, 1635, 1398, 1247, 1139, 961, 780; HRMS(ESI) calcd for  $C_{24}H_{24}NO_6 (M+H)^+$ : 422.1598, Found: 422.1590.

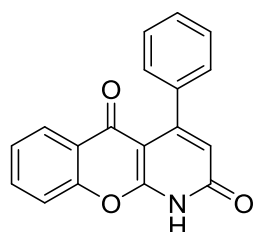

**4**

**Tert-butyl 2,5-dioxo-4-phenyl-2H-chromeno[2,3-b]pyridine-1(5H)-carboxylate (4)** : white solid; mp 330.3-335.8°C;  $^1H$  NMR (400 MHz,  $CDCl_3$ )  $\delta$  = 9.94 (s, 1H), 8.22 (d,  $J$  = 7.6 Hz, 1H), 8.10 (d,  $J$  = 7.6 Hz, 1H), 7.82-7.77 (m, 2H), 7.47 (s, 3H), 7.31 (s, 1H), 6.74 (s, 1H);  $^{13}C$  NMR (100 MHz,  $CDCl_3$ )  $\delta$  = 175.2, 170.3, 154.6, 153.7, 141.4, 133.4, 129.0, 127.4, 126.7, 126.3, 125.7, 123.3, 117.3, 102.3; FTIR ( $cm^{-1}$ : KBr): 2918, 2849, 1643, 1517, 1467, 1390, 1328, 1296, 1248, 1006, 924, 880, 764; HRMS(ESI) calcd for  $C_{24}H_{24}NO_6 (M+H)^+$ : 422.1598, Found: 422.1590.



#### IV: $^1\text{H}$ , $^{13}\text{C}$ NMR and HPLC dates of products

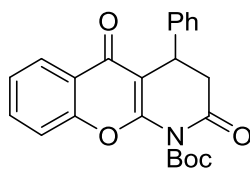

3a

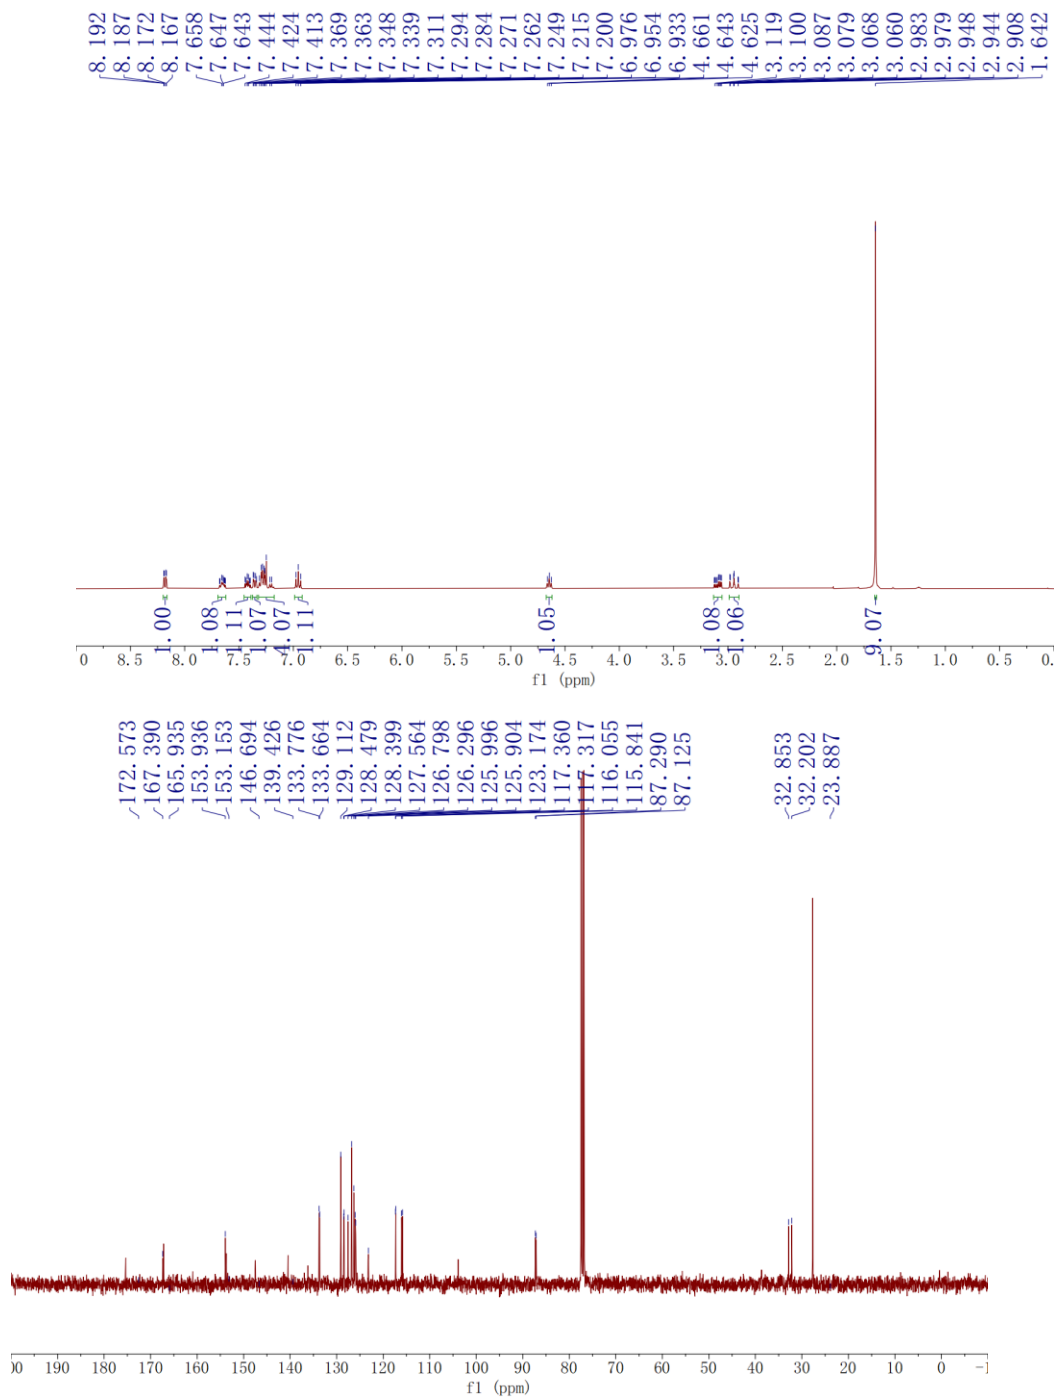

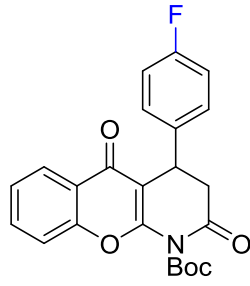

**3b**

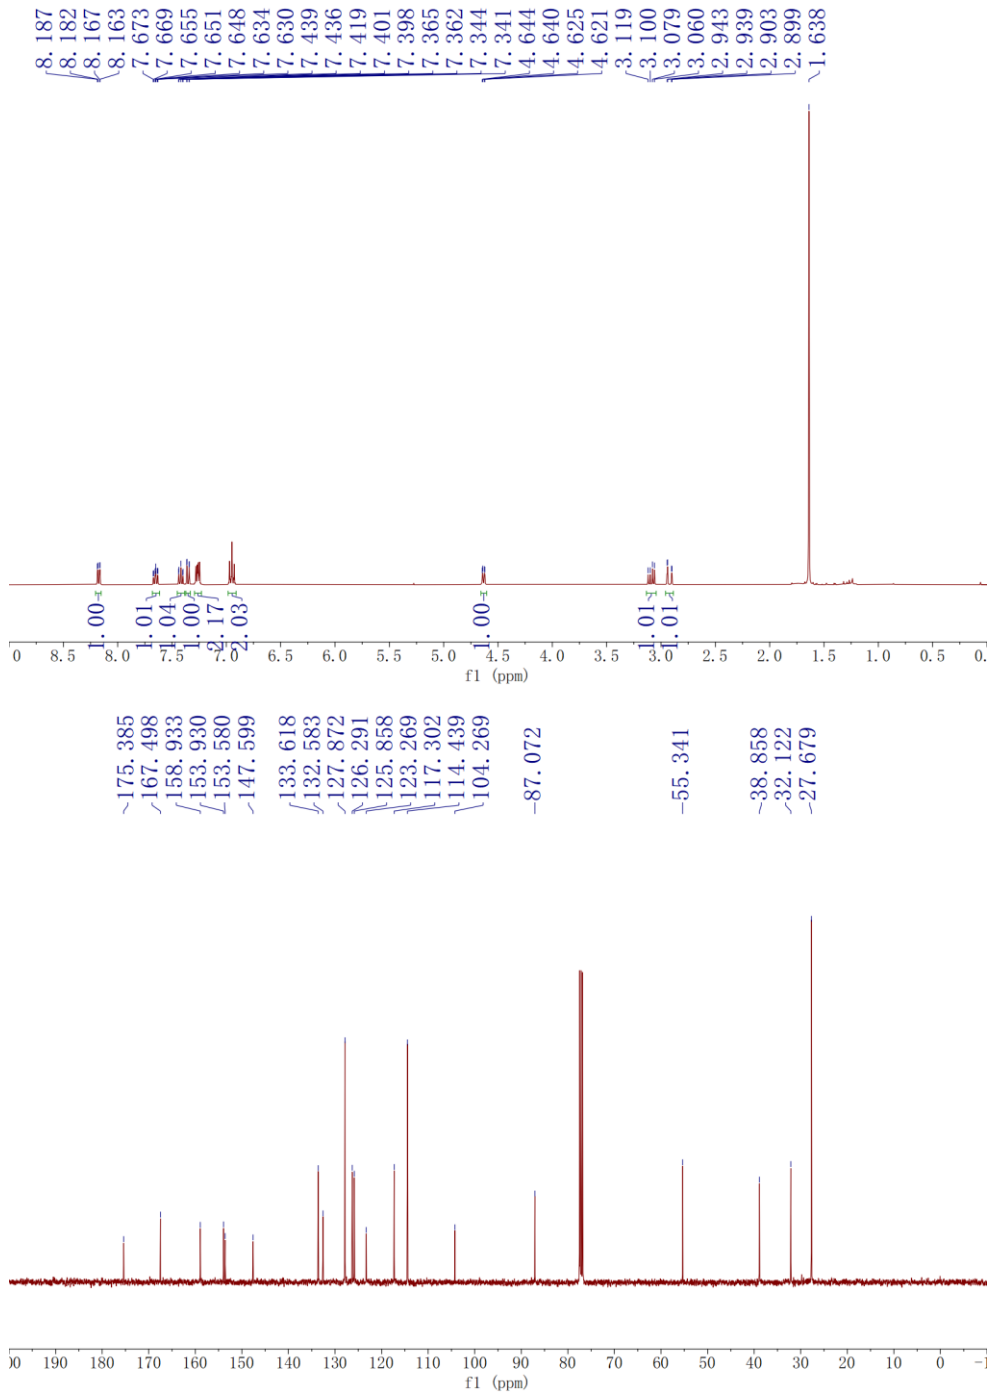

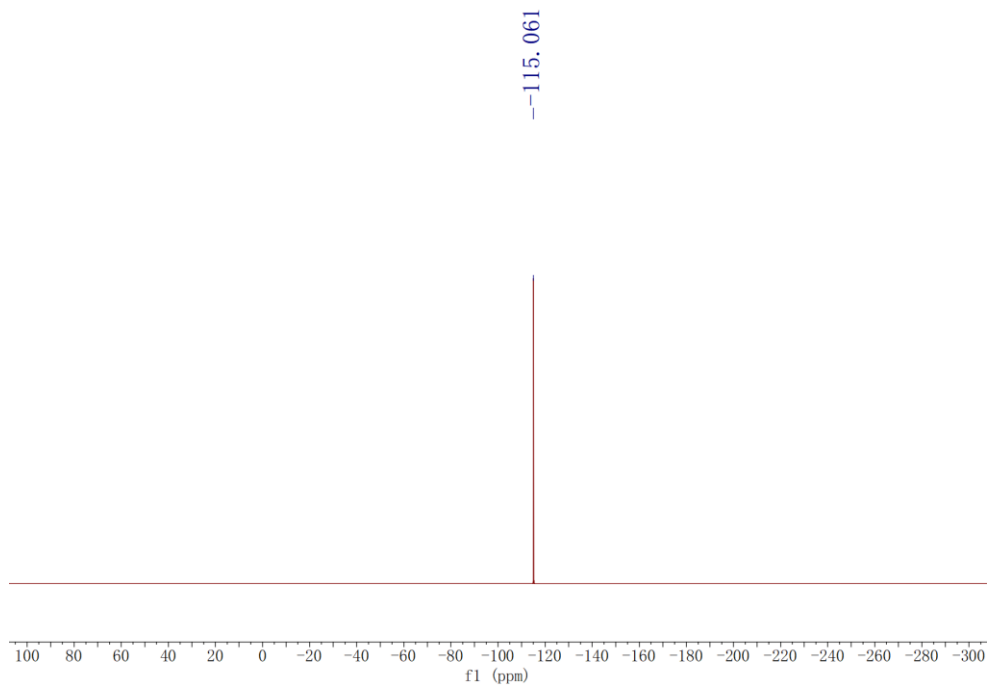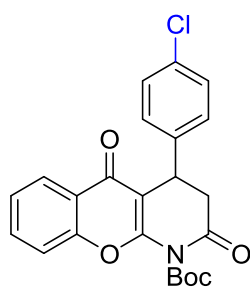

**3c**

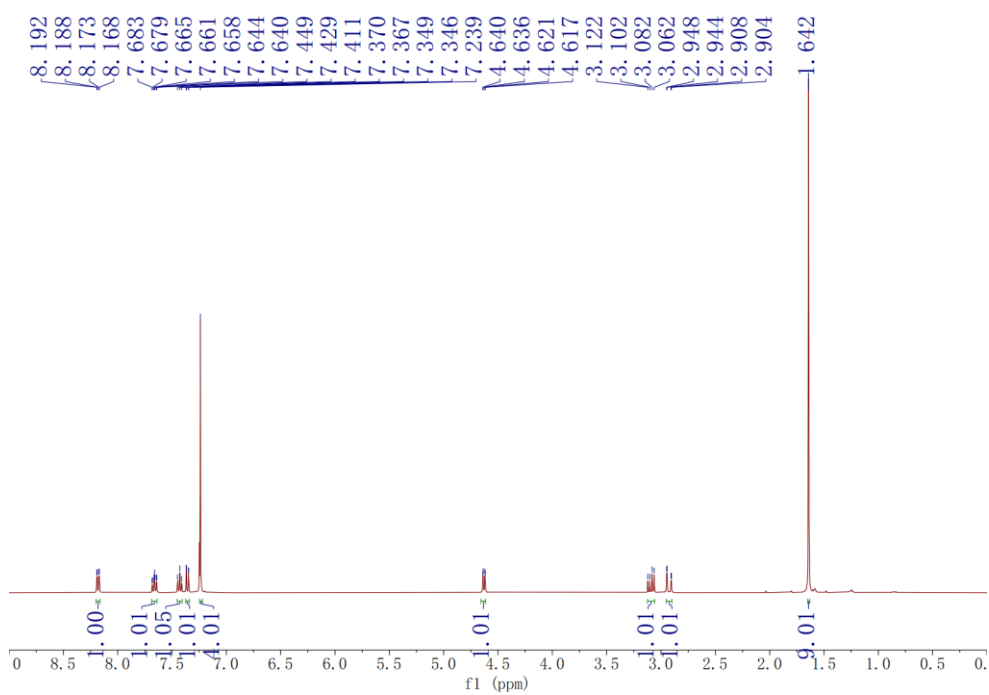

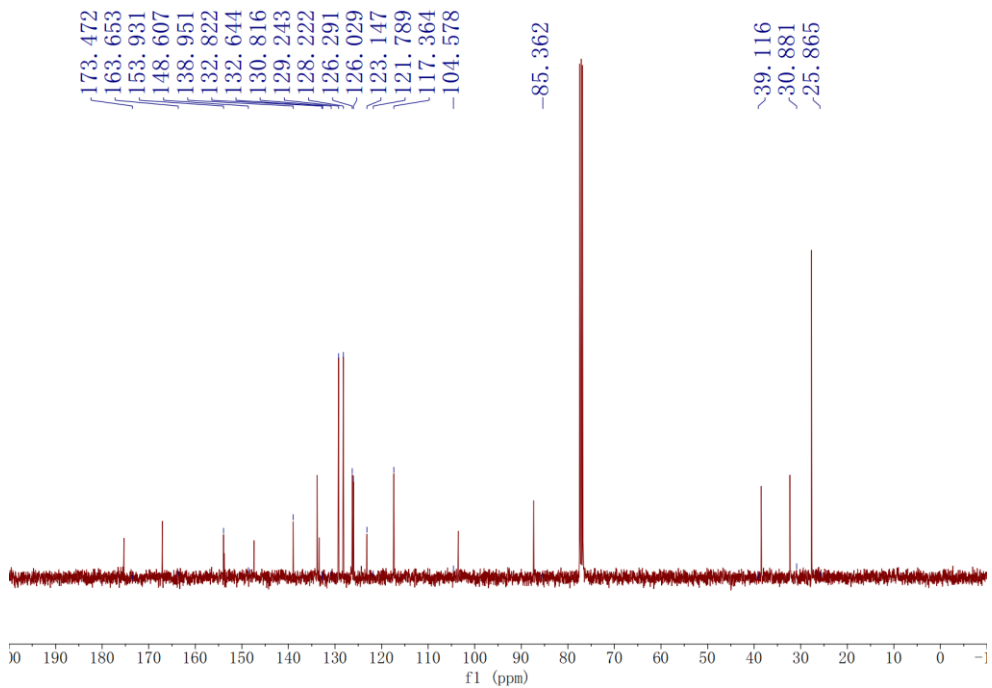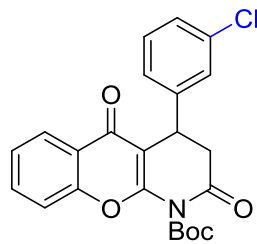

**3d**

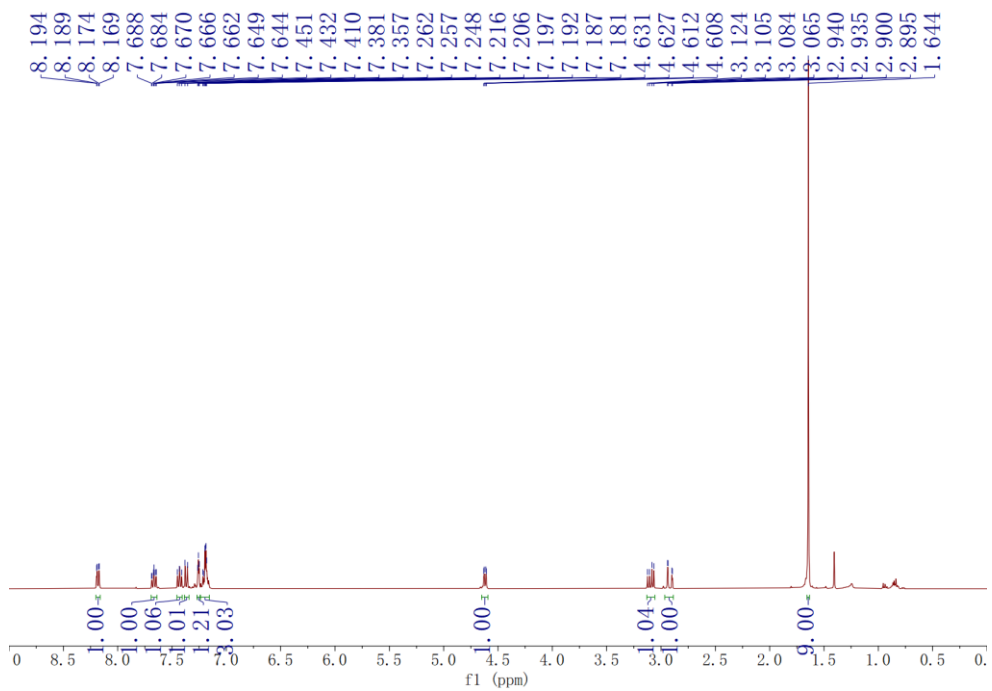

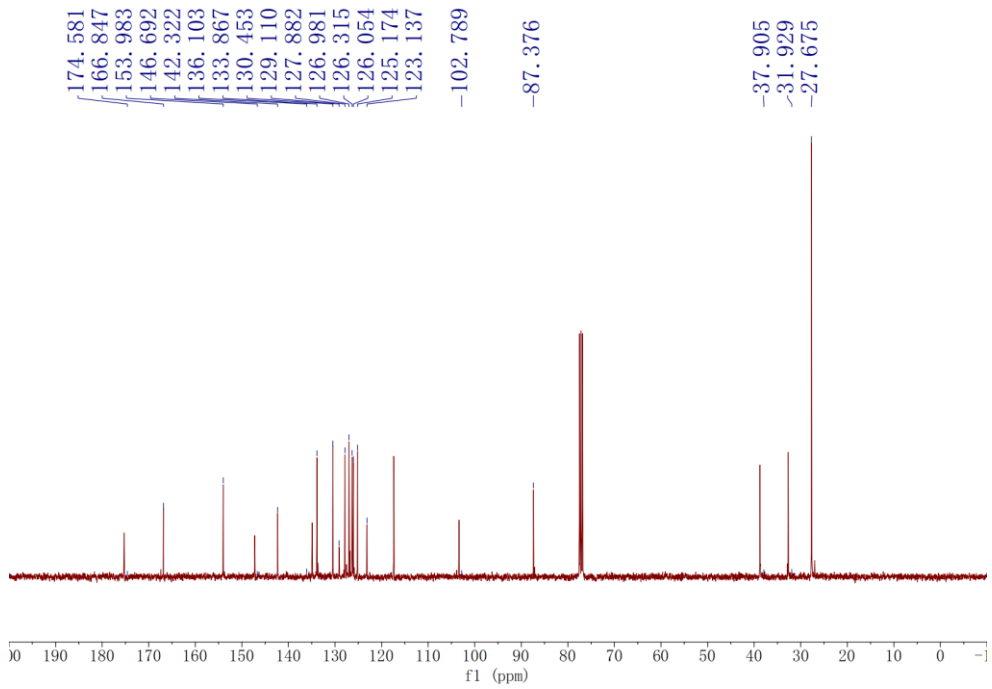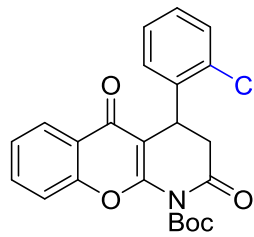

**3e**

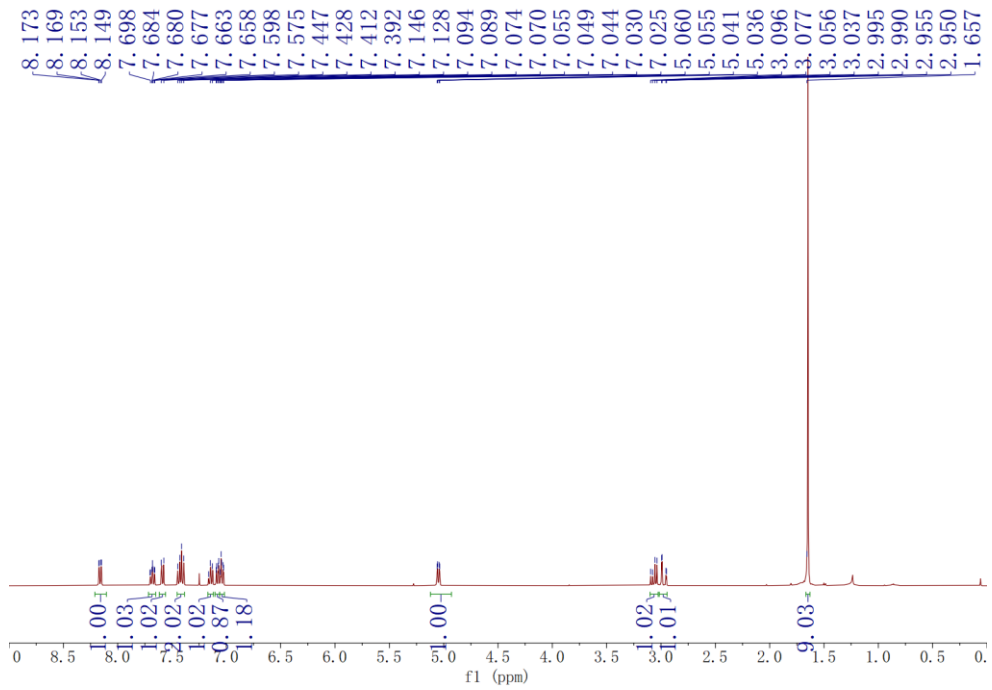

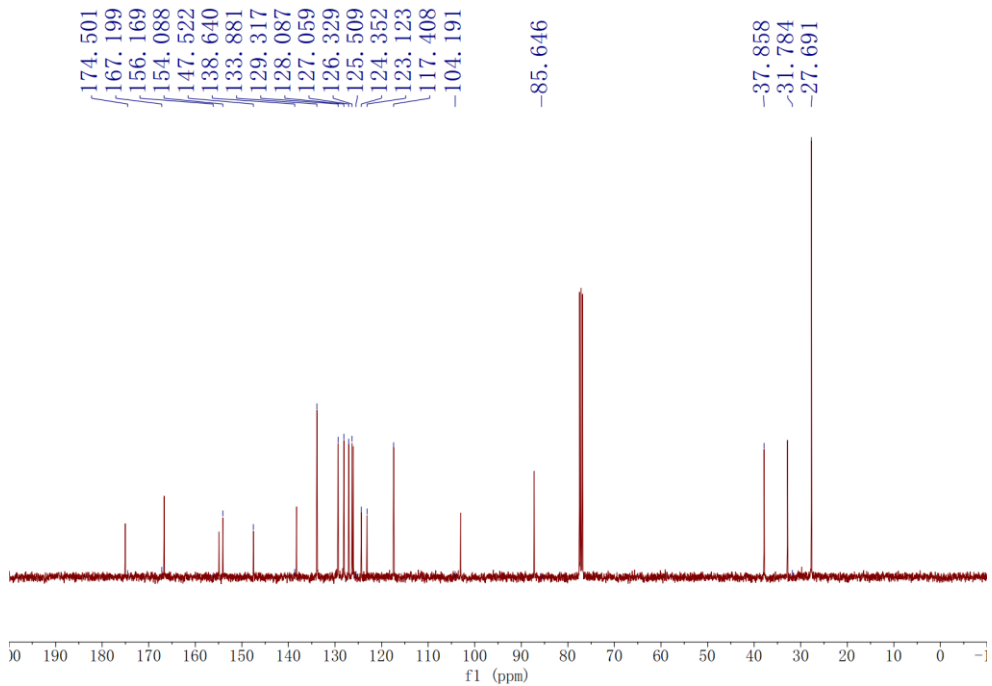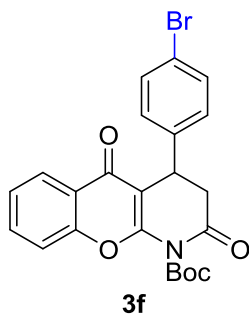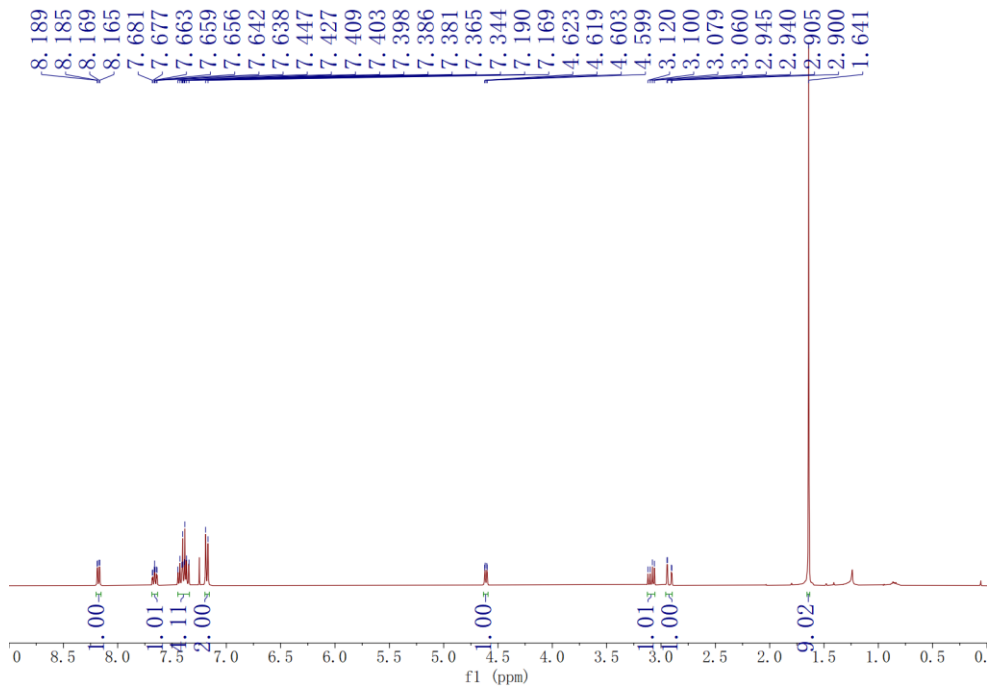

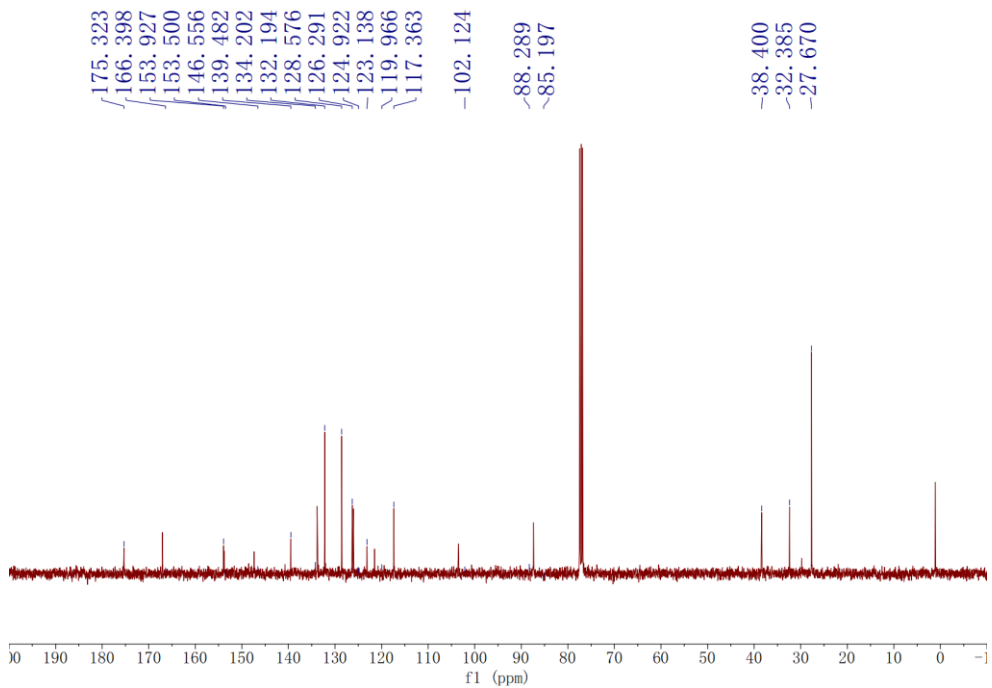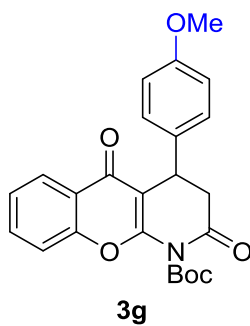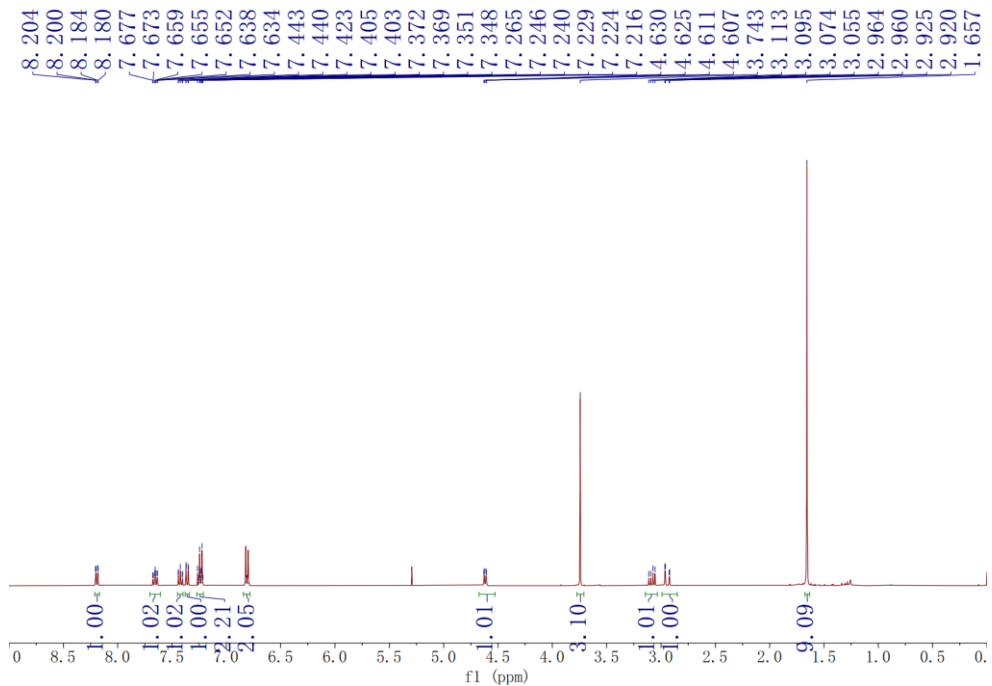

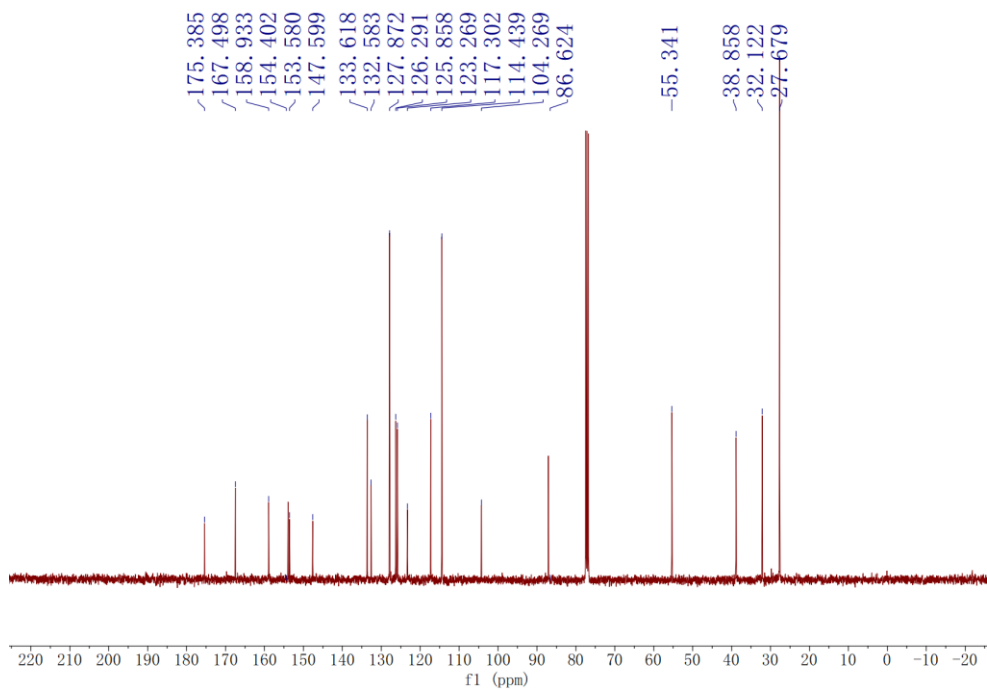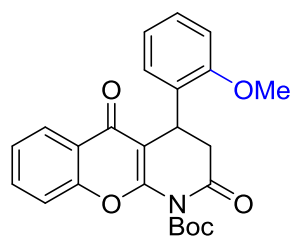

**3h**

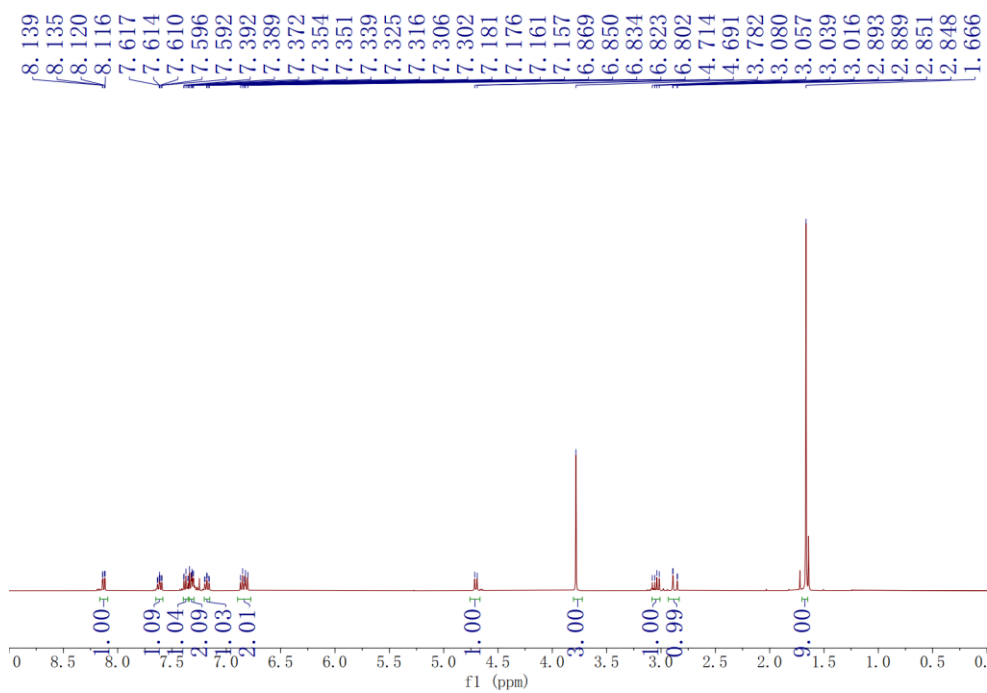



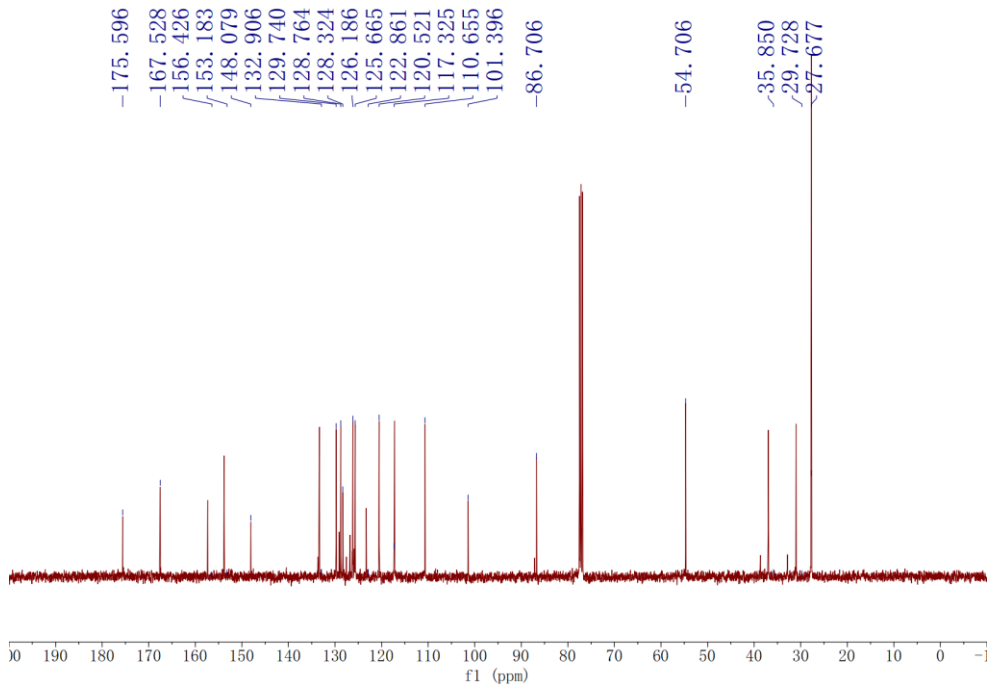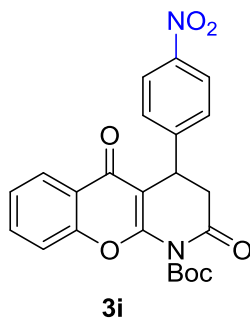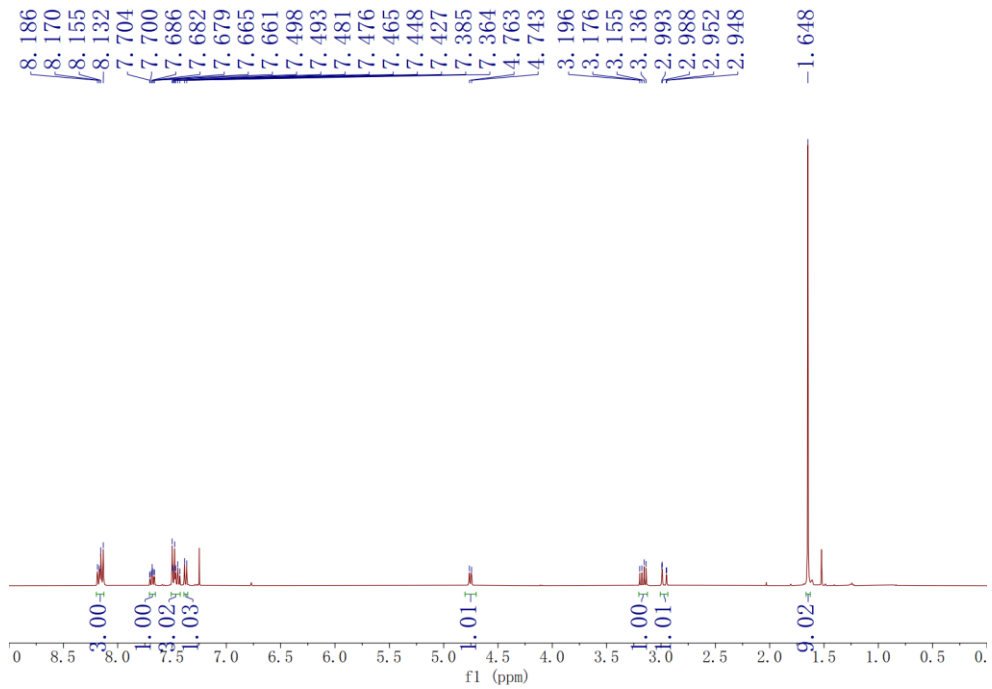

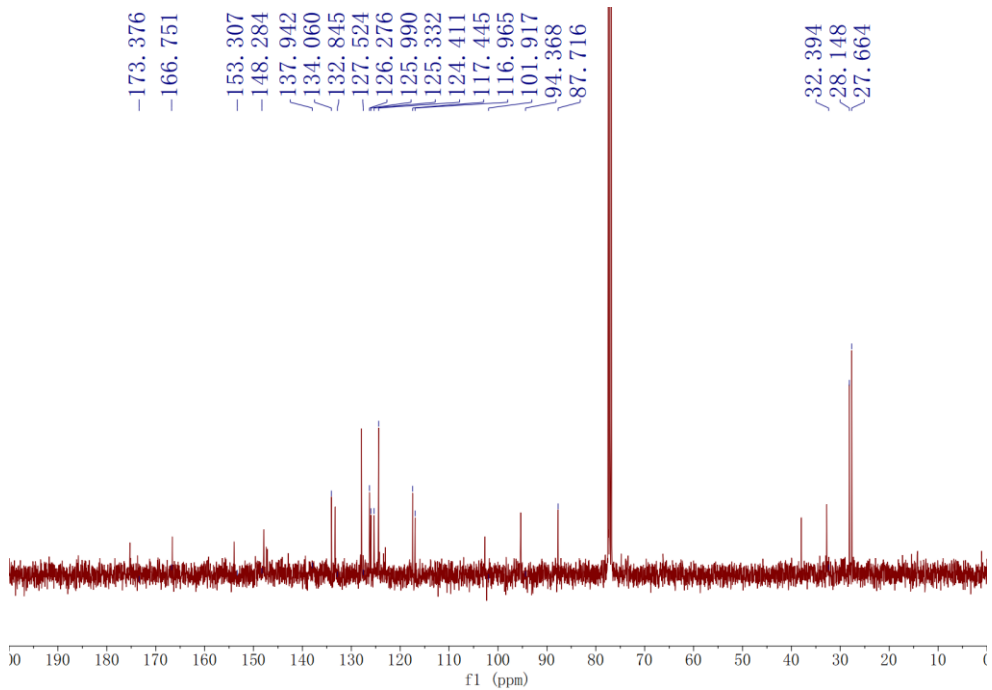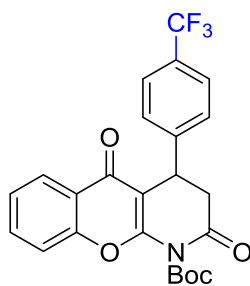

**3j**

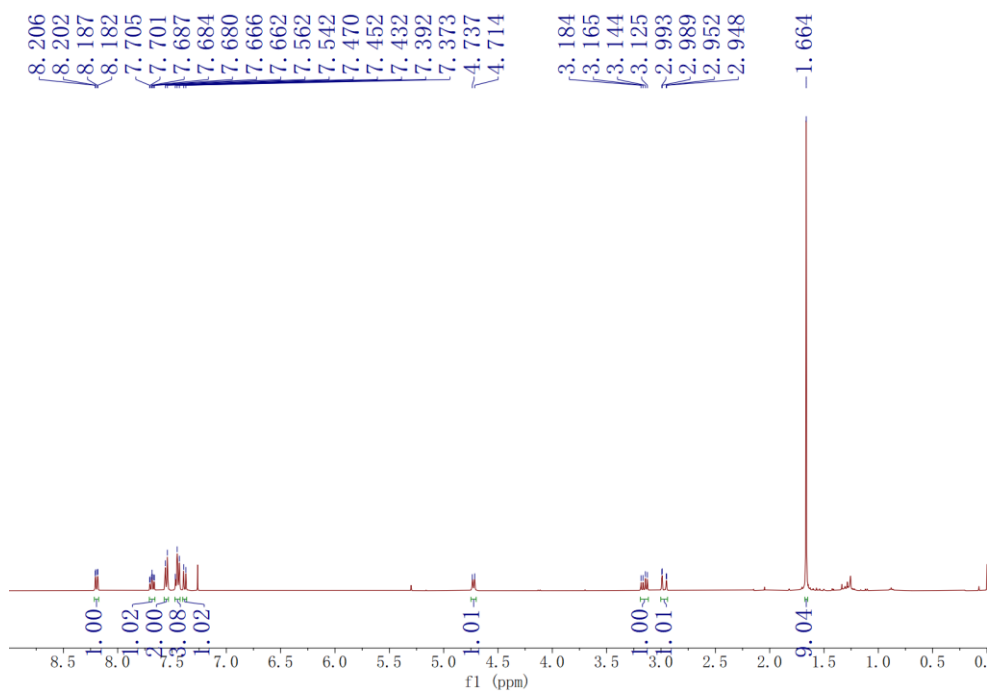

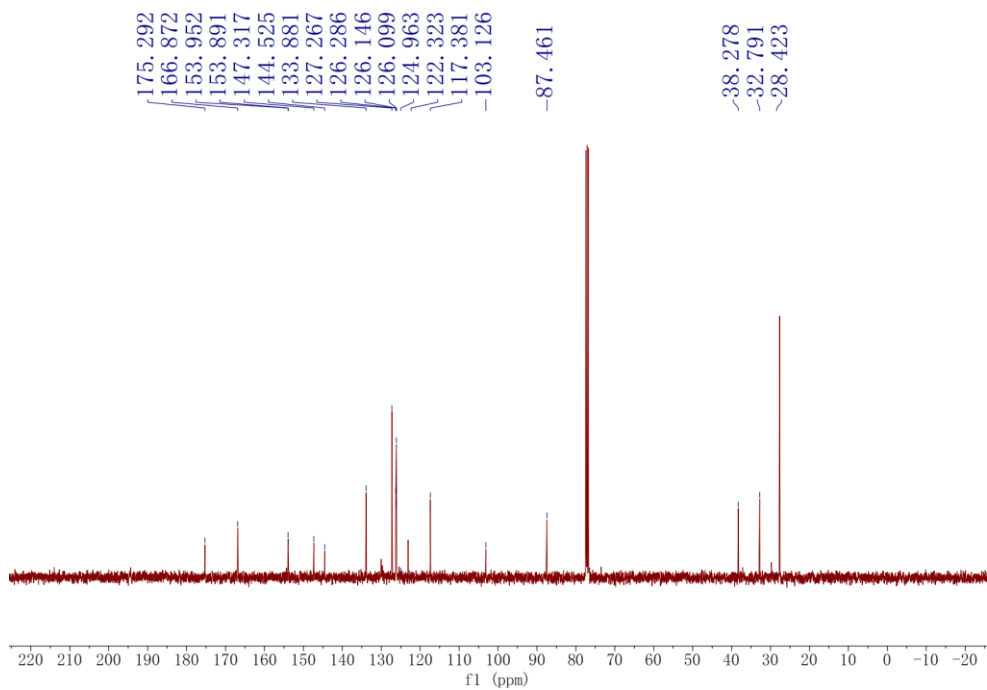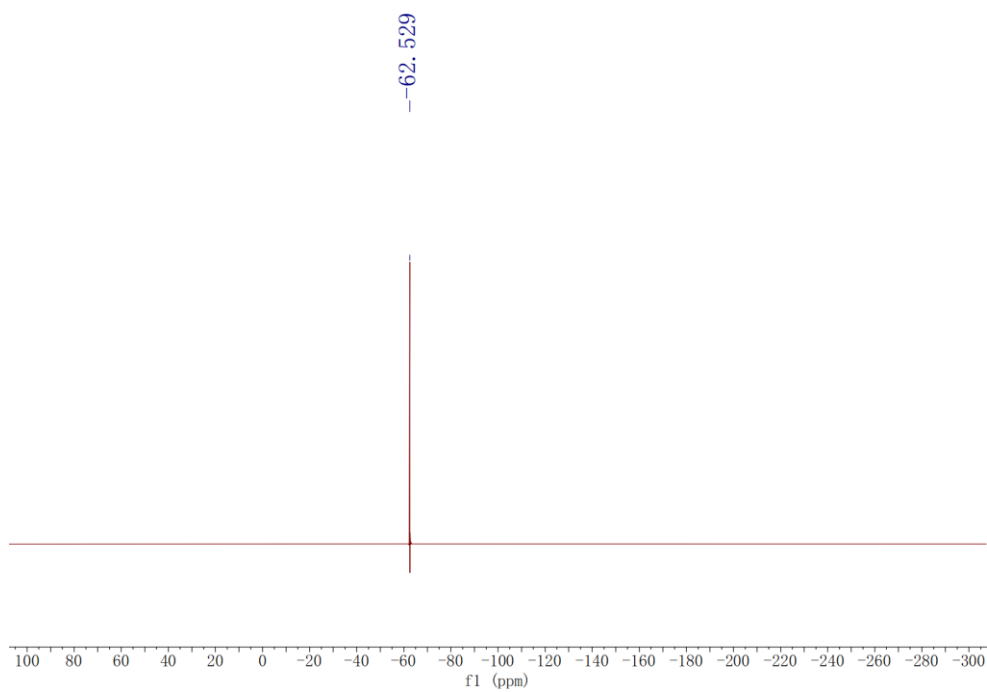

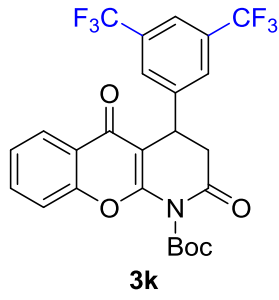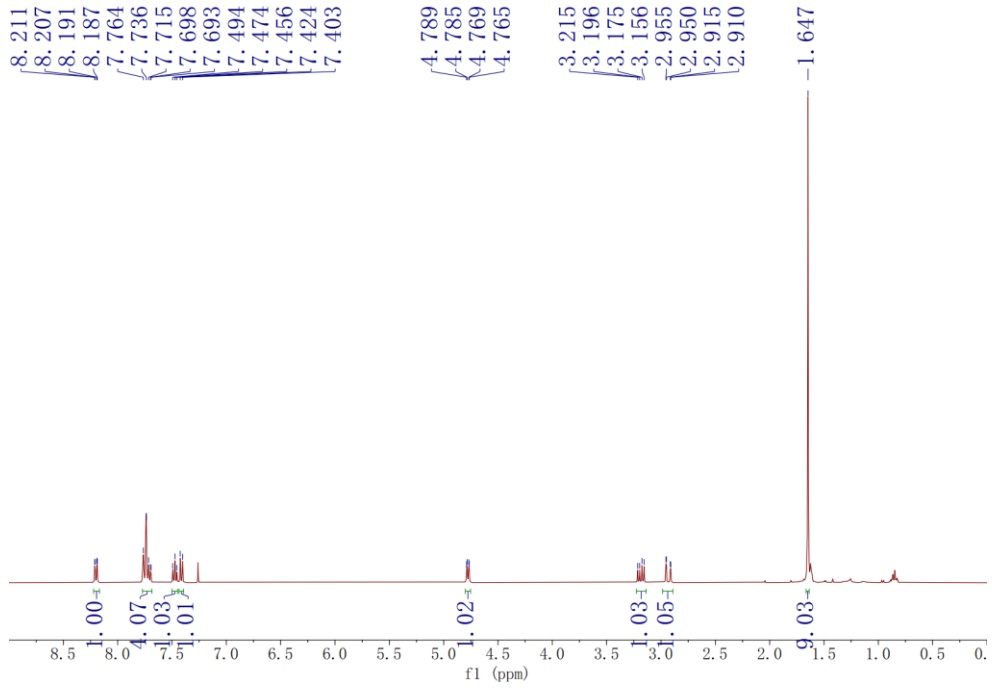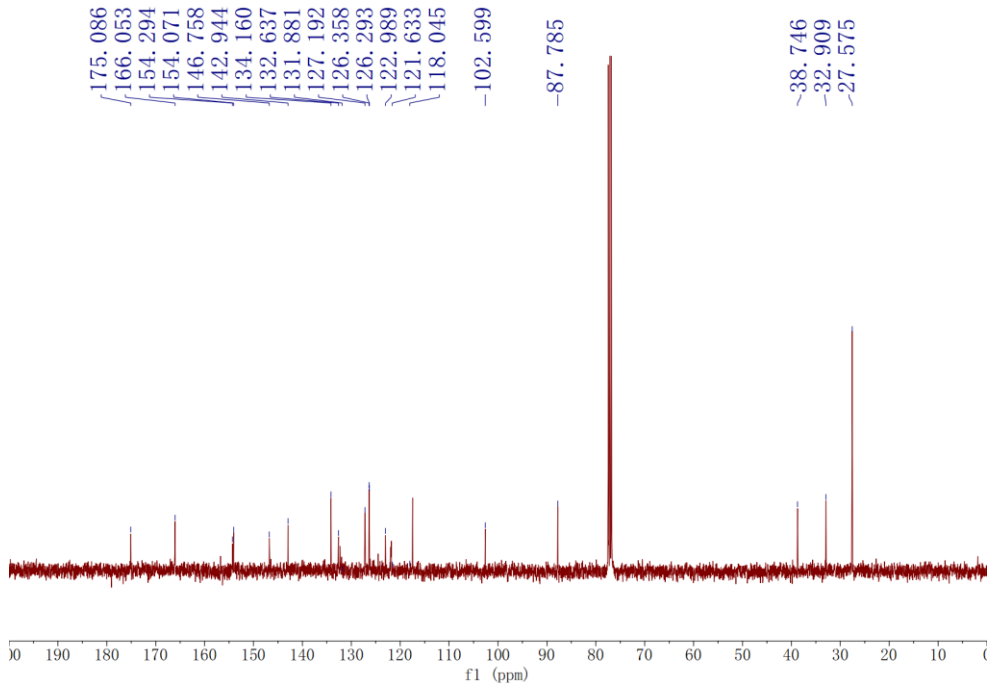

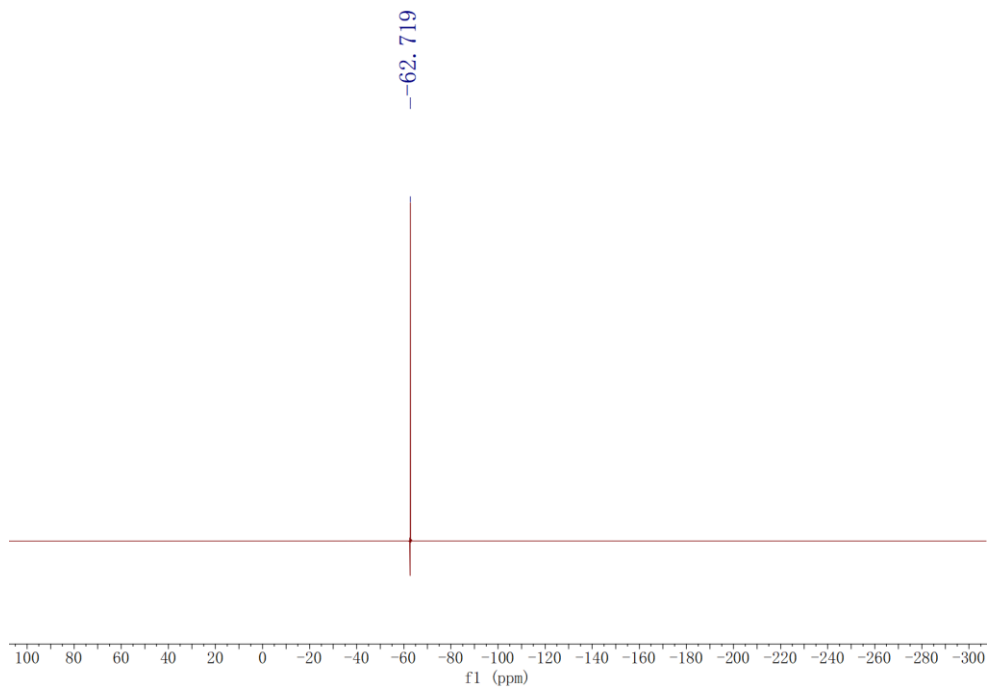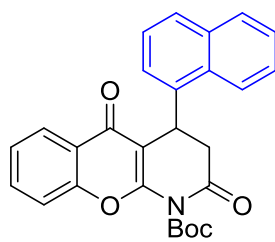

**31**

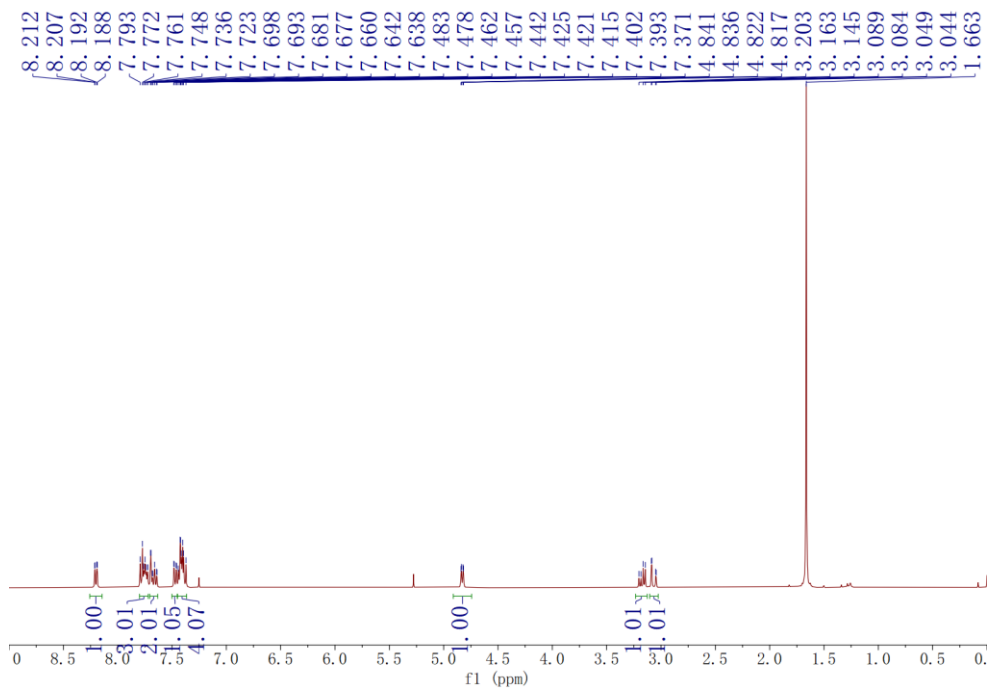

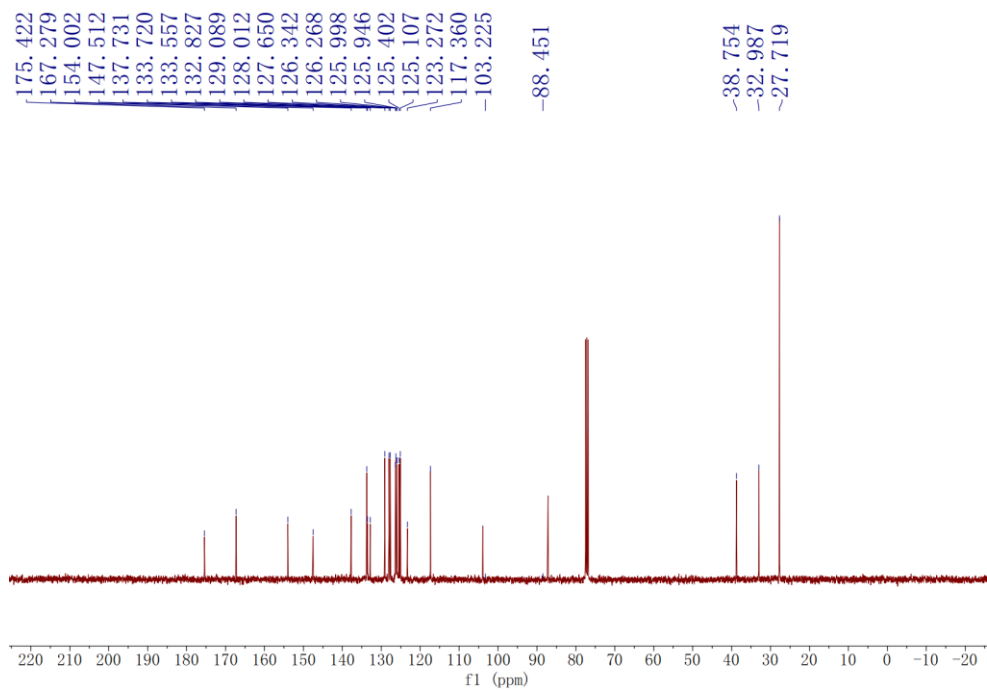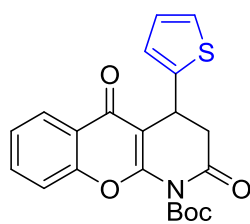

**3m**

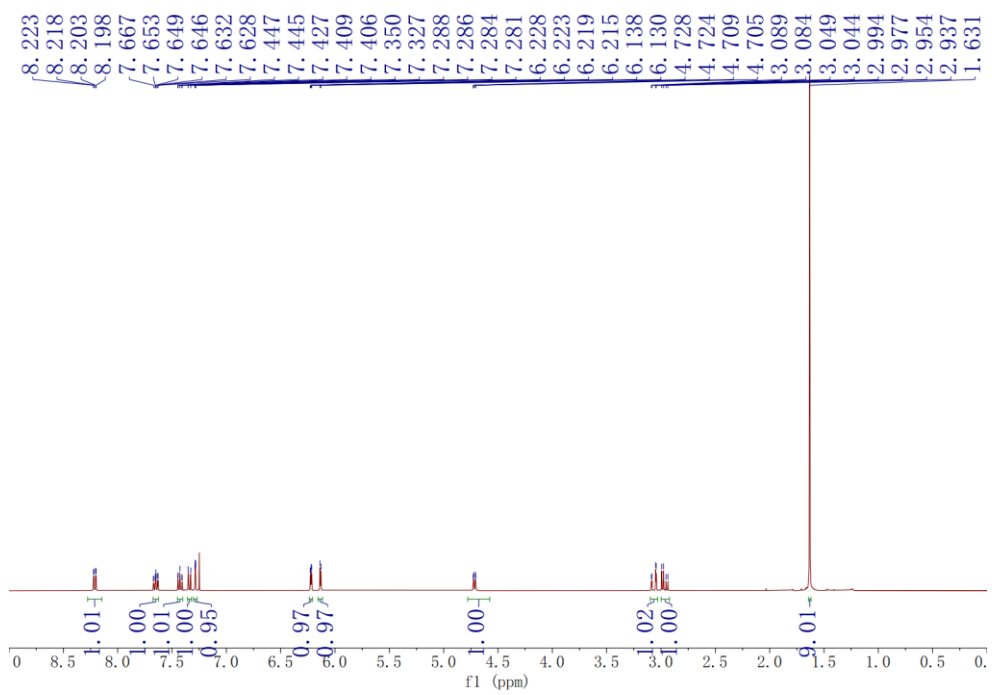

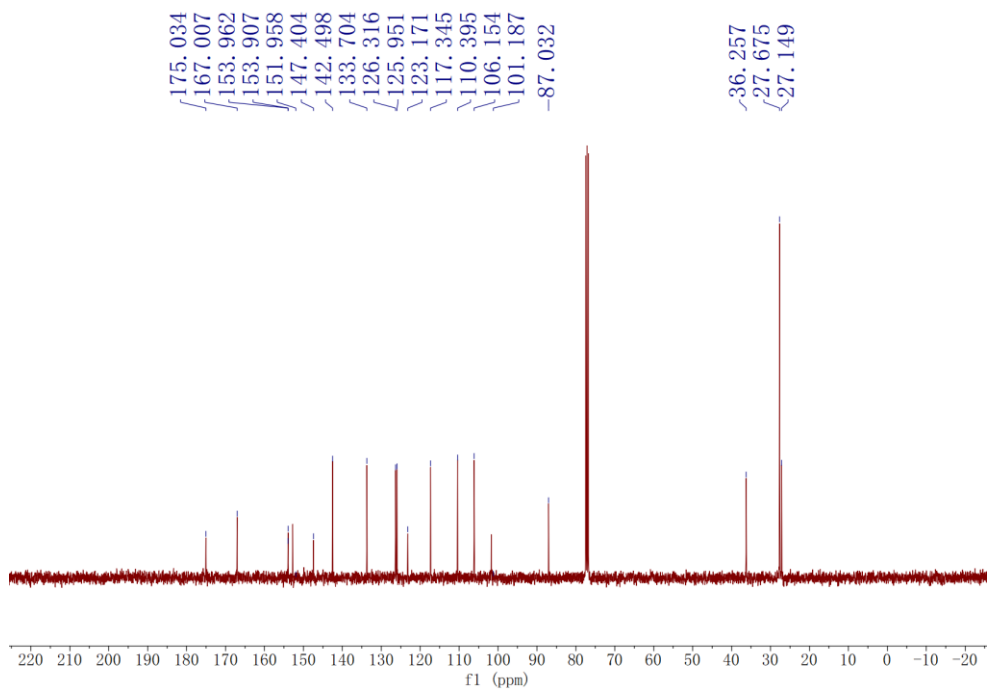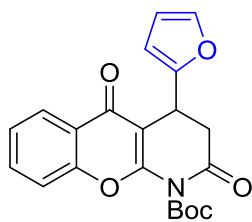

**3n**

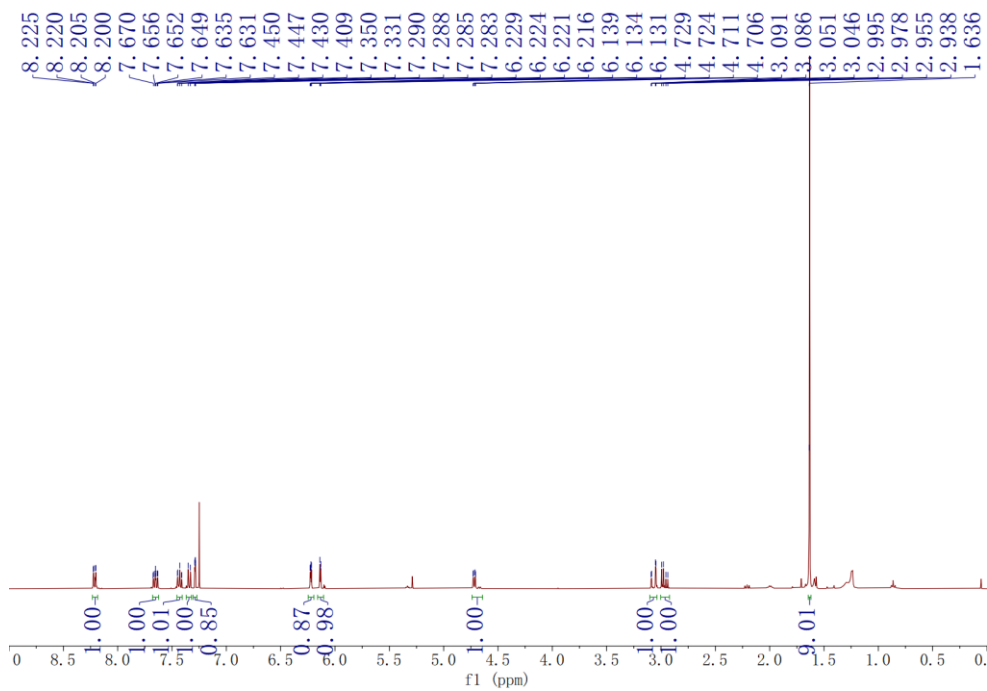

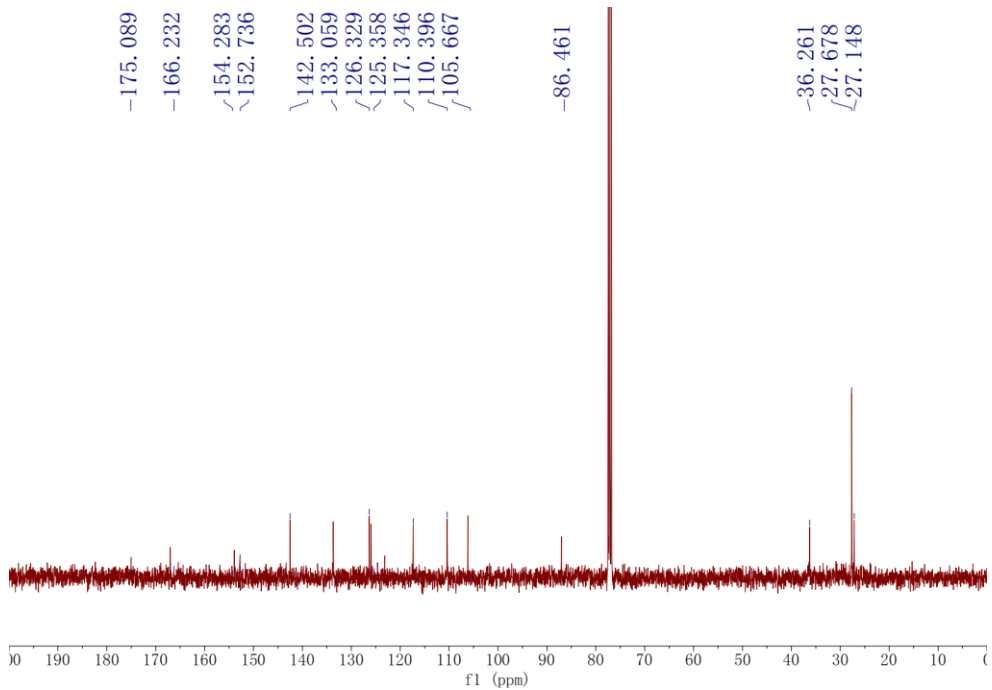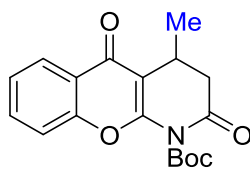

**3o**

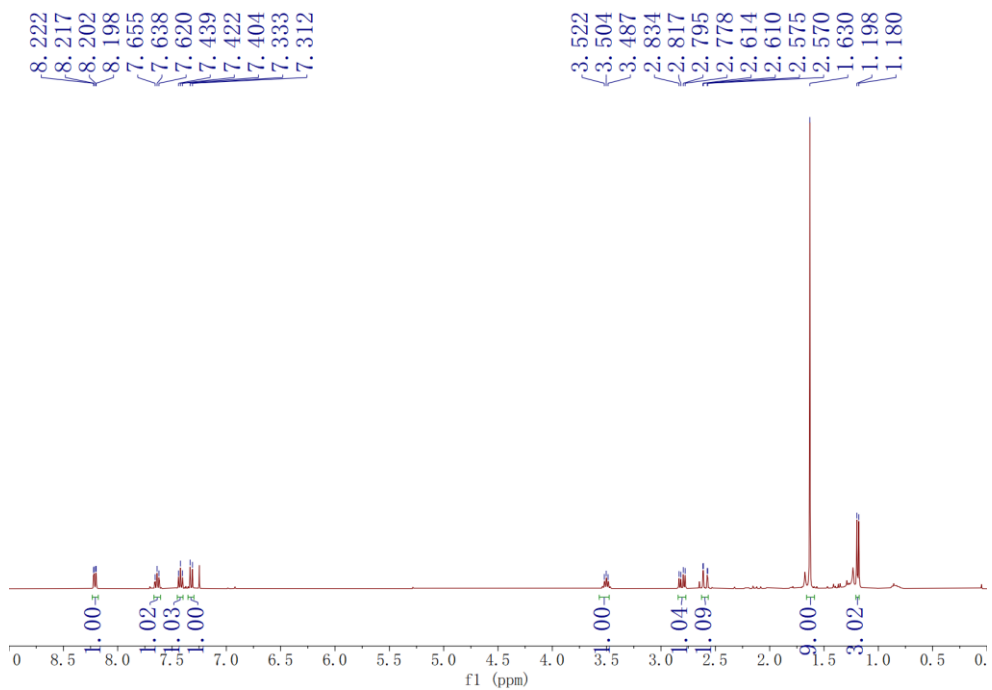



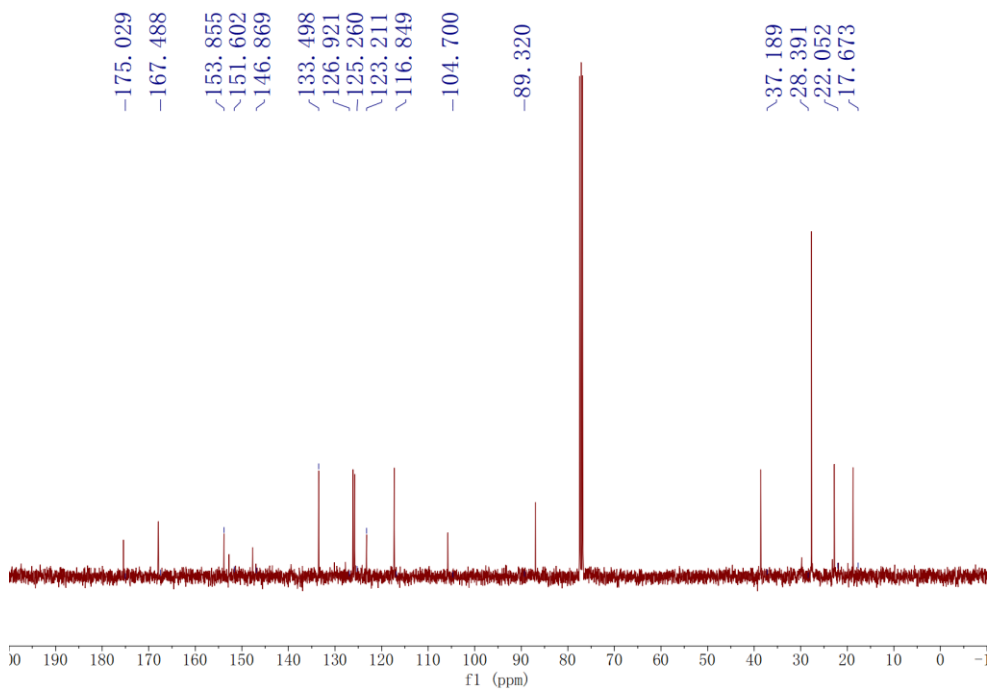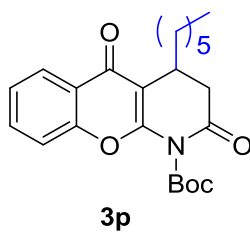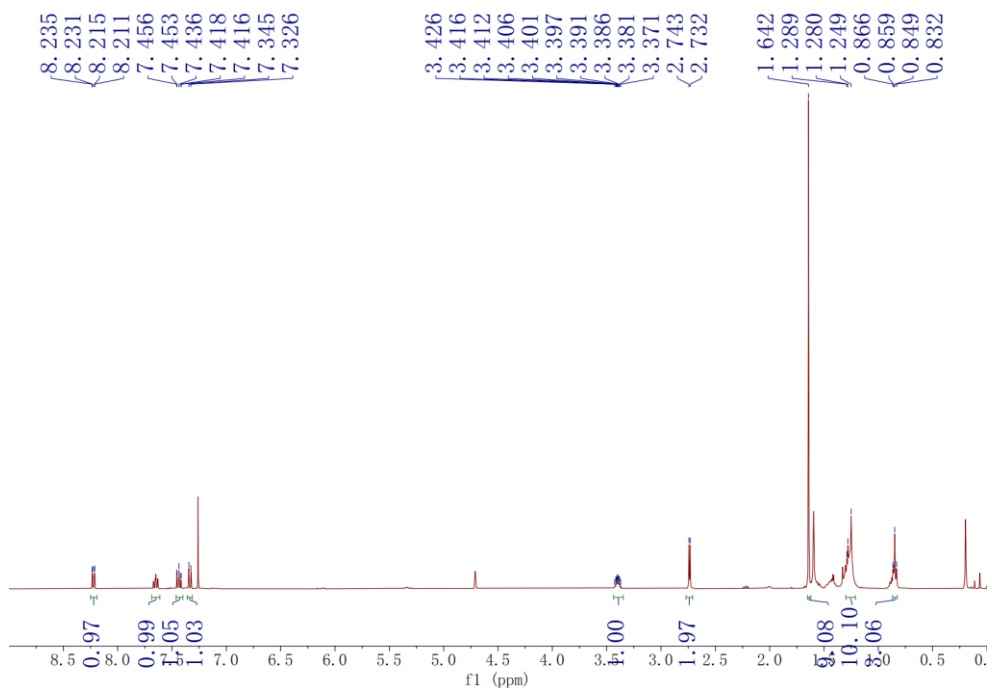

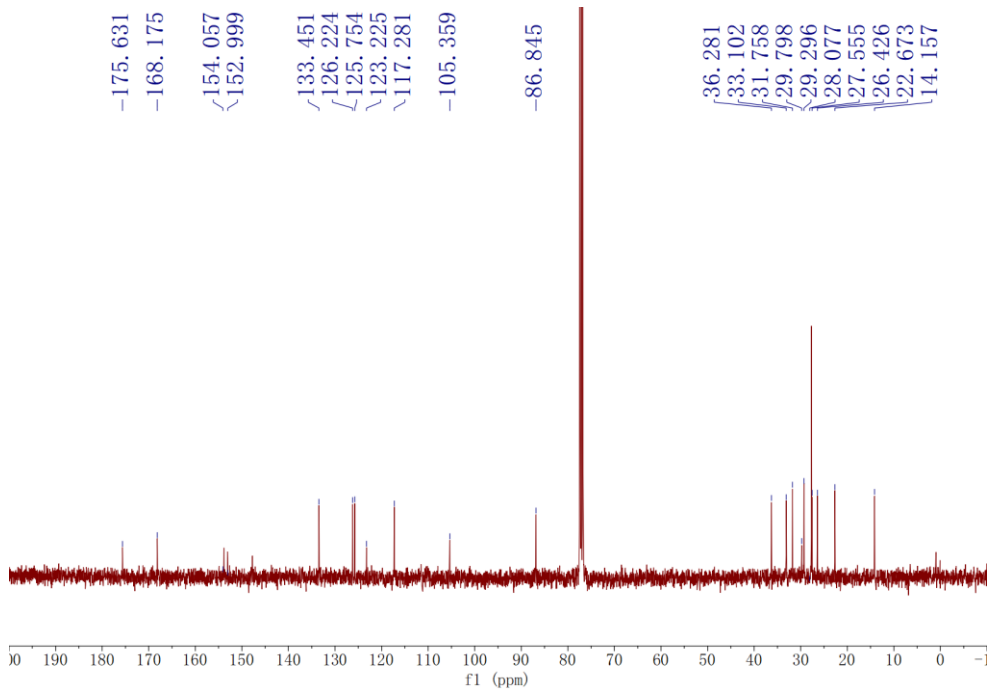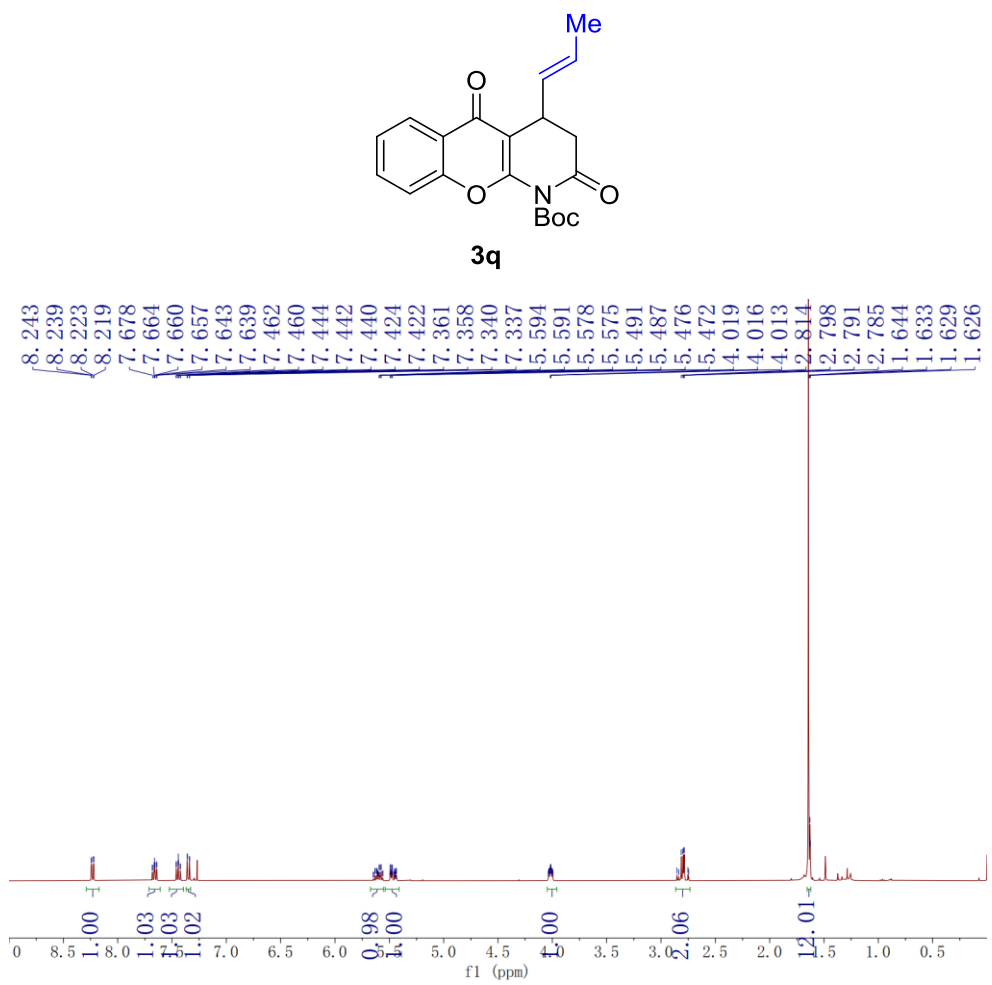

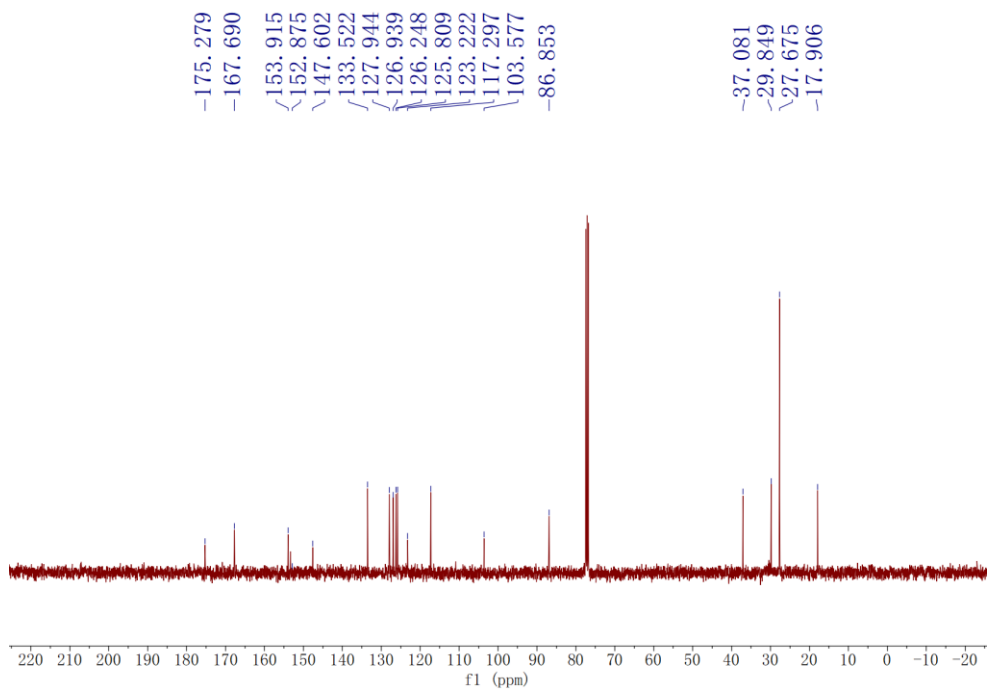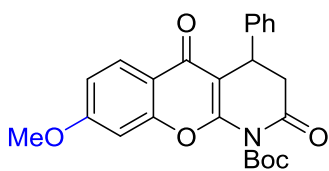

**3r**

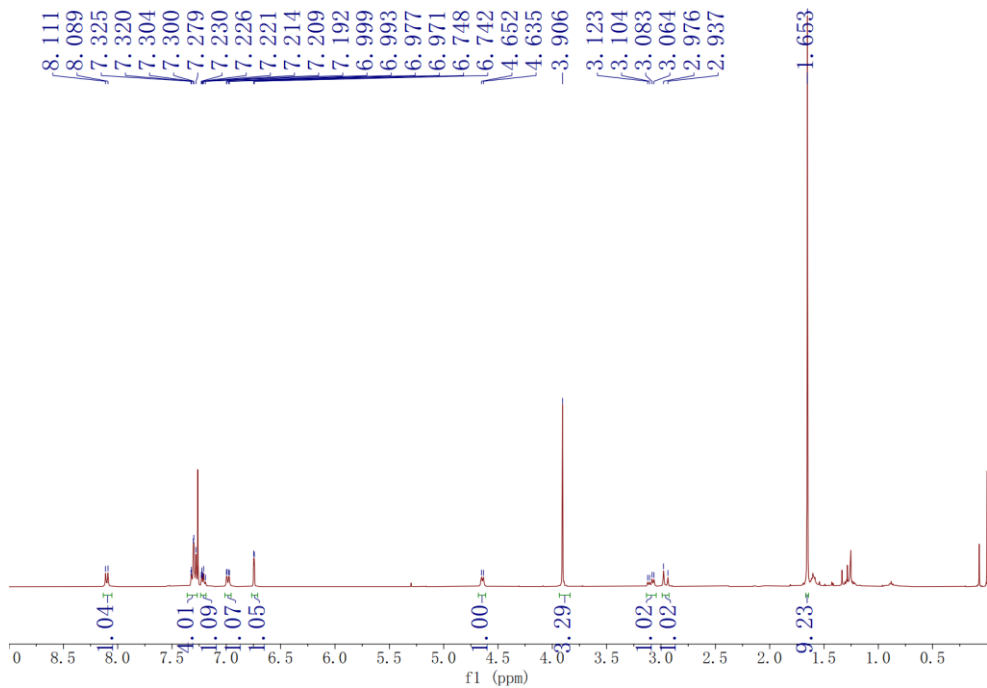

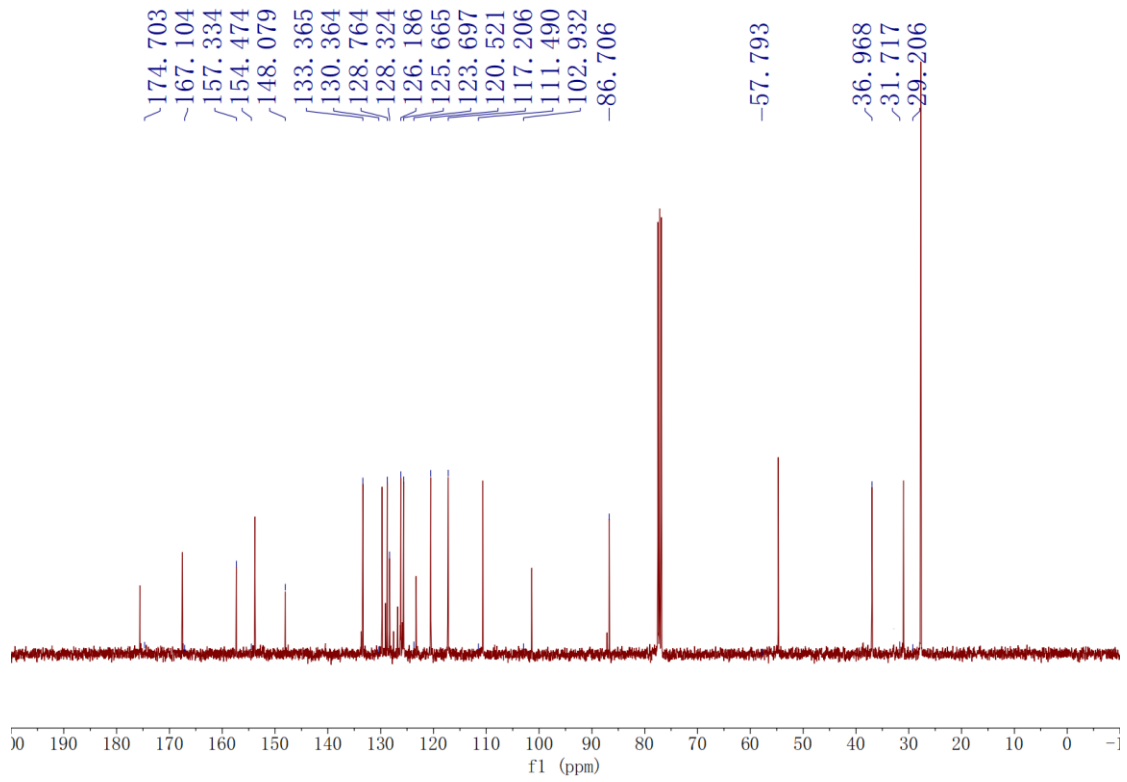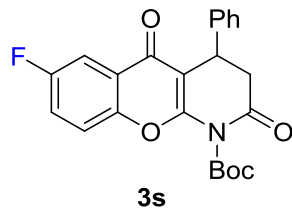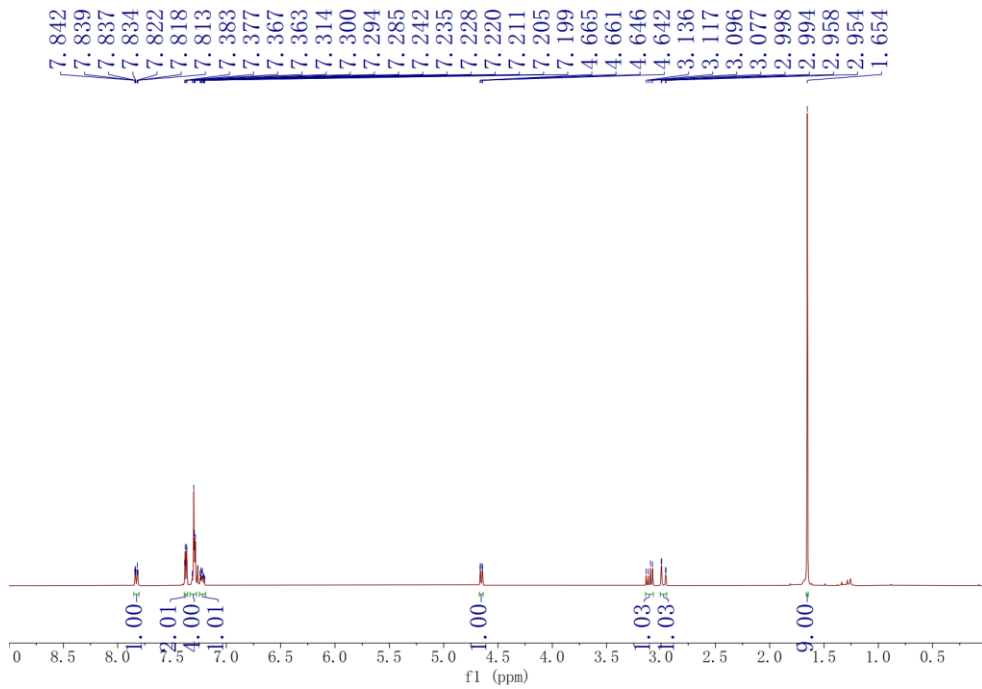

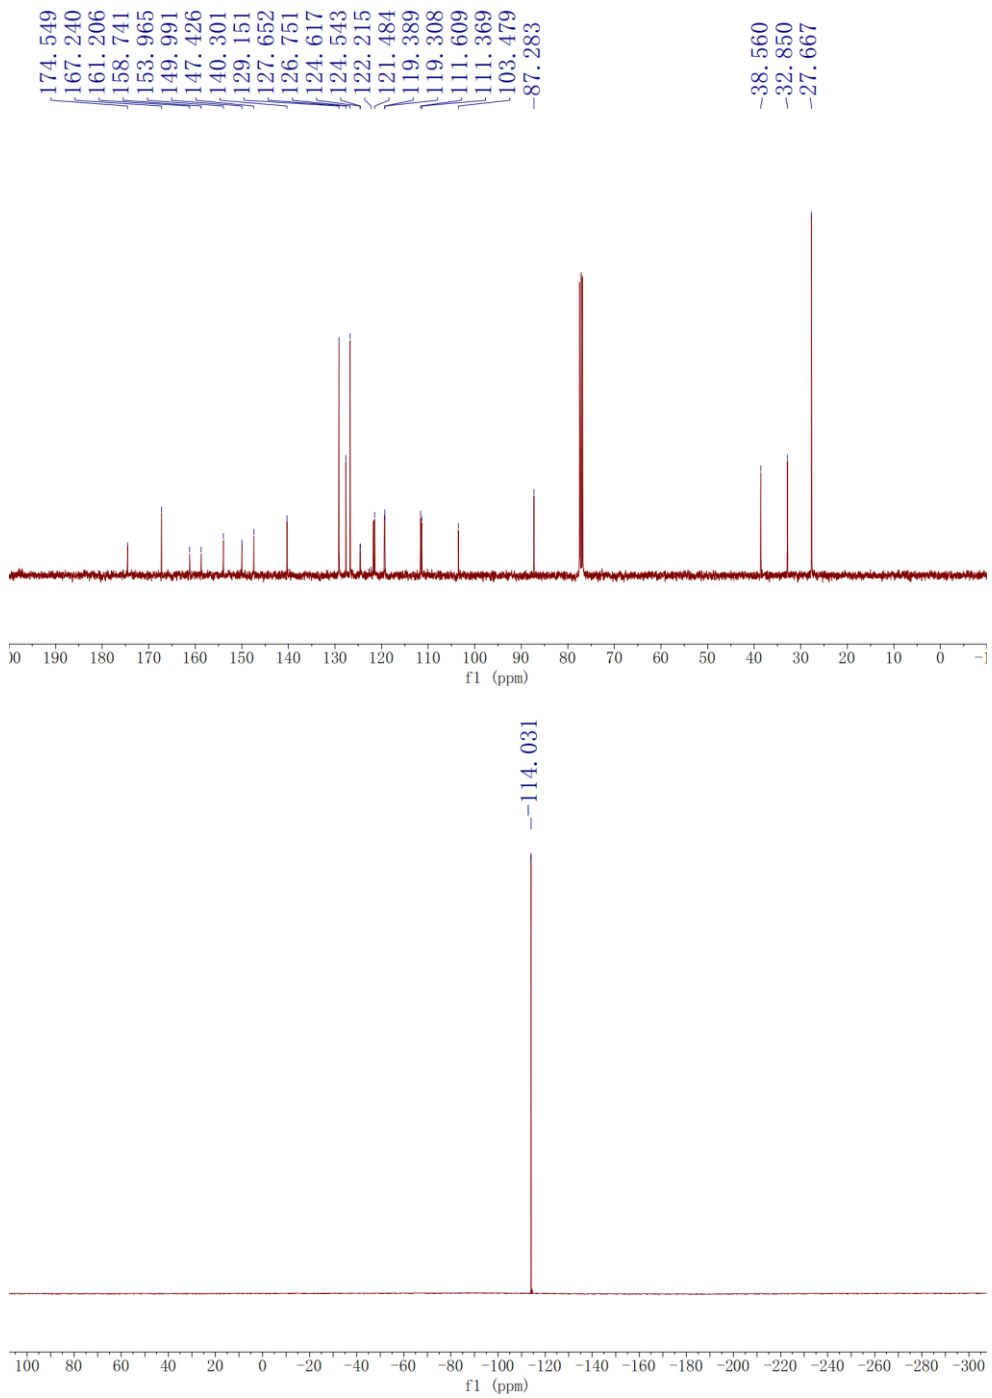

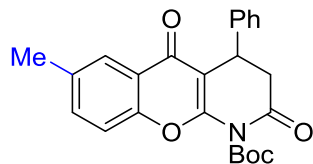

3t

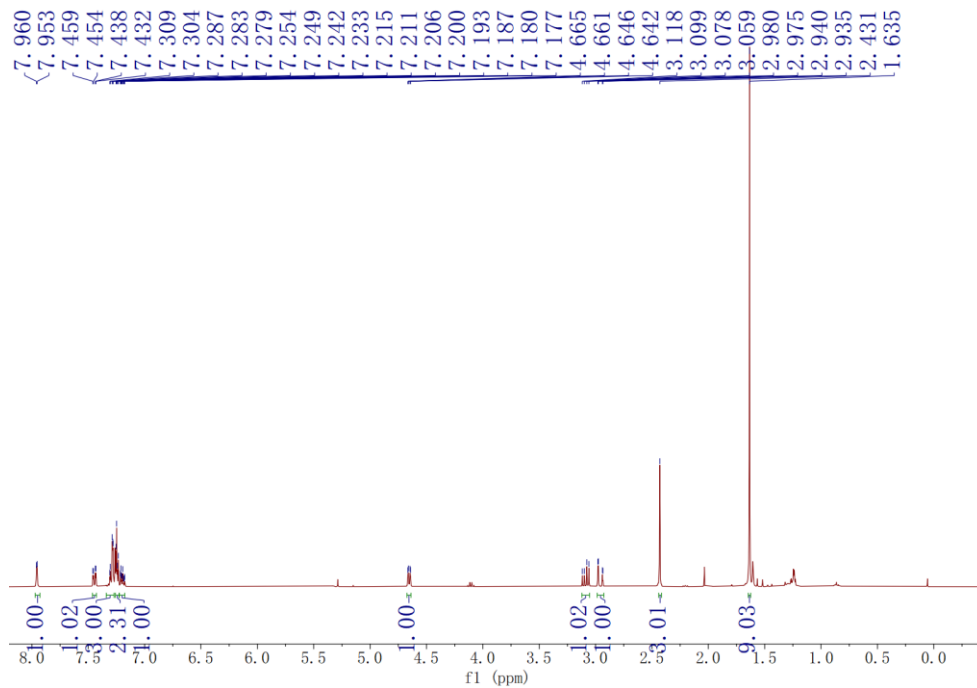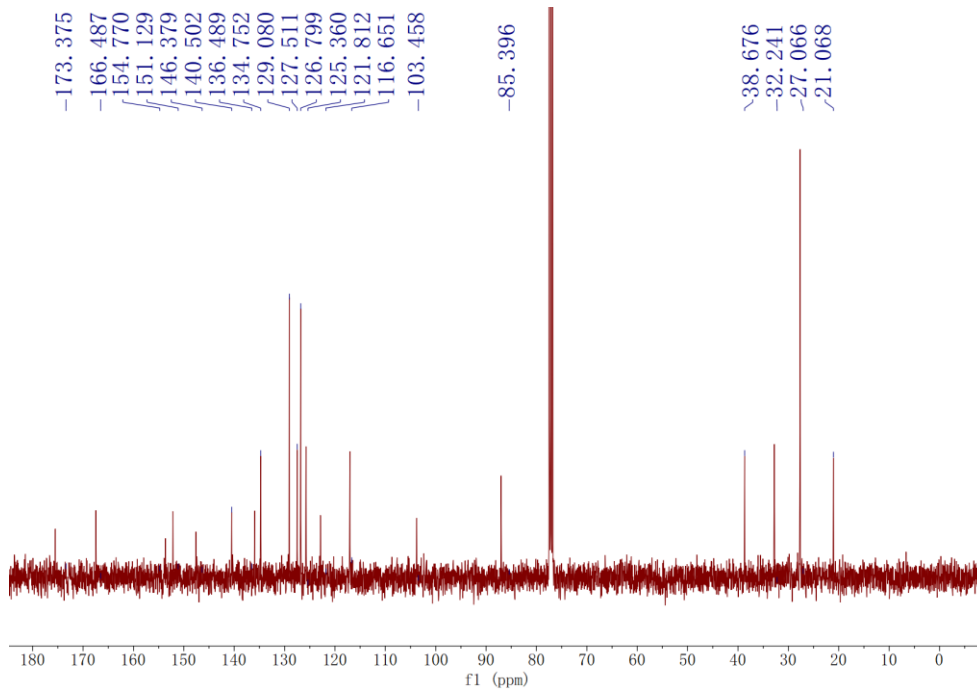

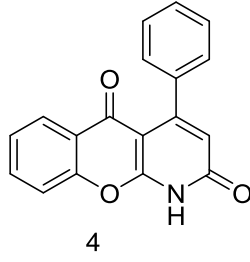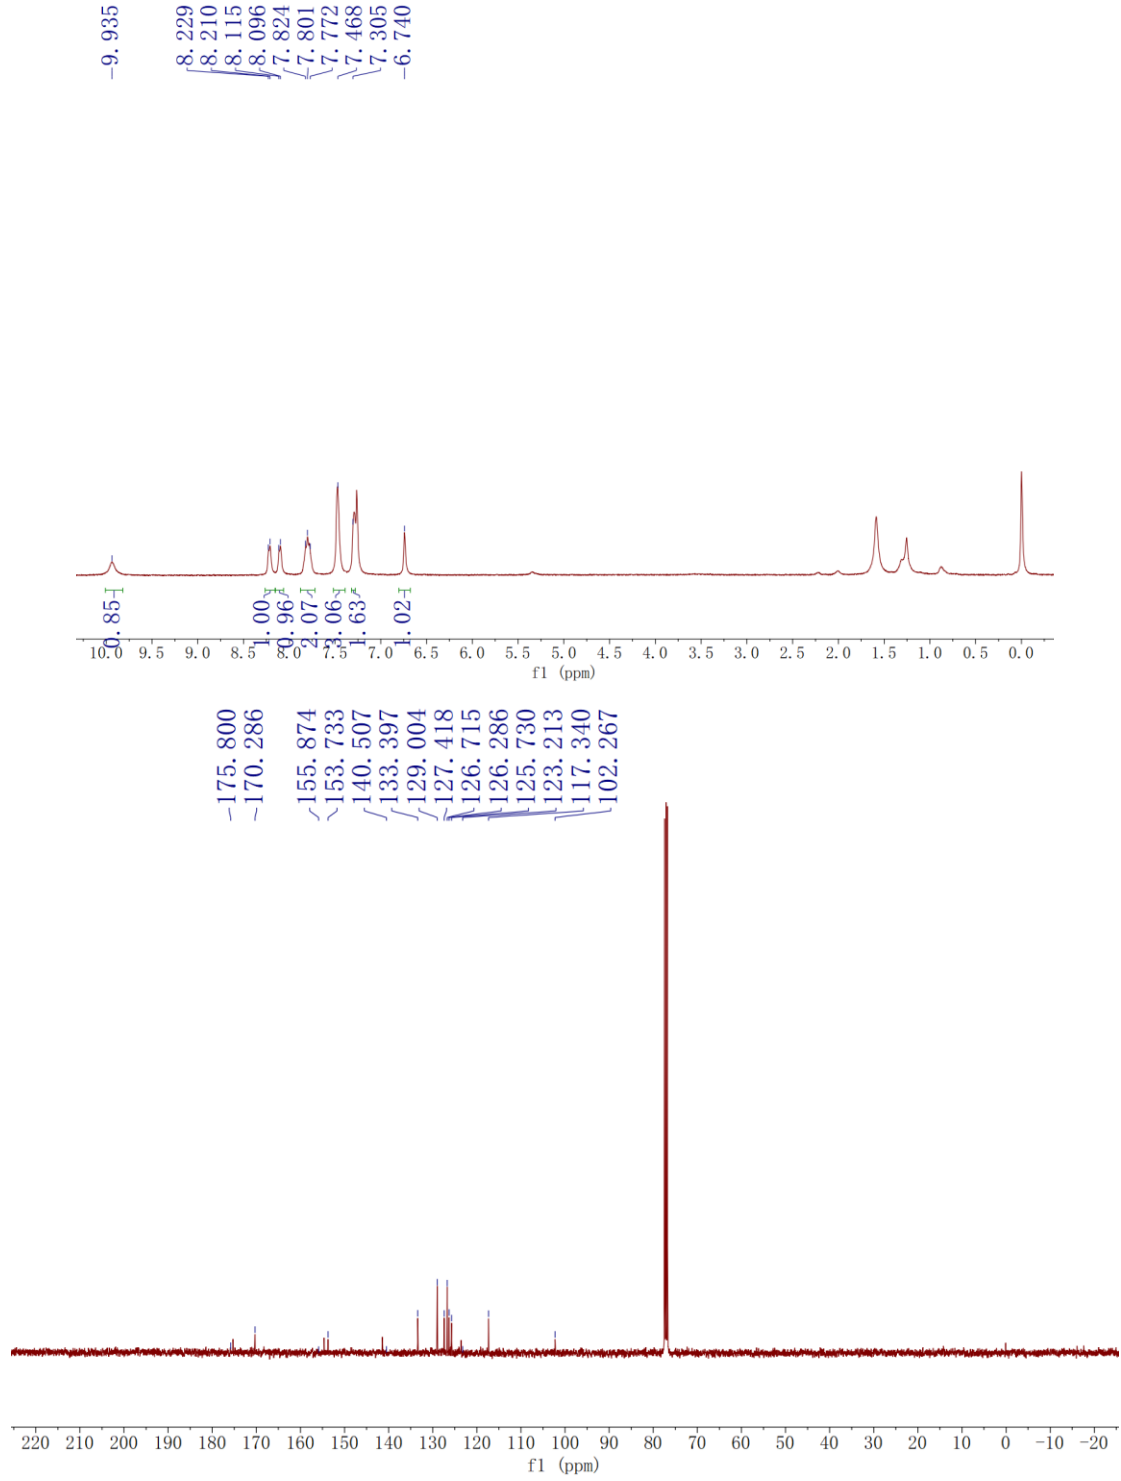

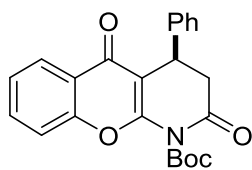

**<Chromatogram>**

mAU

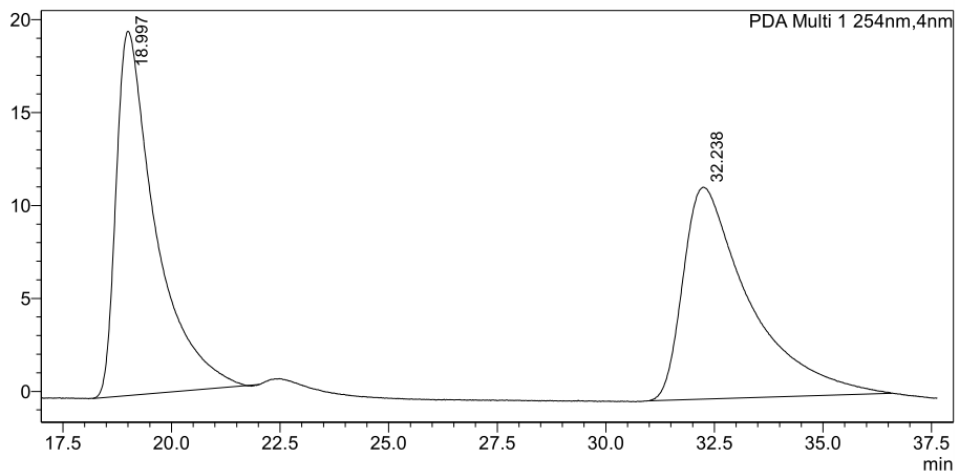

**<Peak Table>**

PDA Ch1 254nm

| Peak# | Ret. Time | Area    | Area%   | Height |
|-------|-----------|---------|---------|--------|
| 1     | 18.997    | 1235028 | 50.502  | 19596  |
| 2     | 32.238    | 1210498 | 49.498  | 11405  |
| Total |           | 2445527 | 100.000 | 31000  |

**<Chromatogram>**

mAU

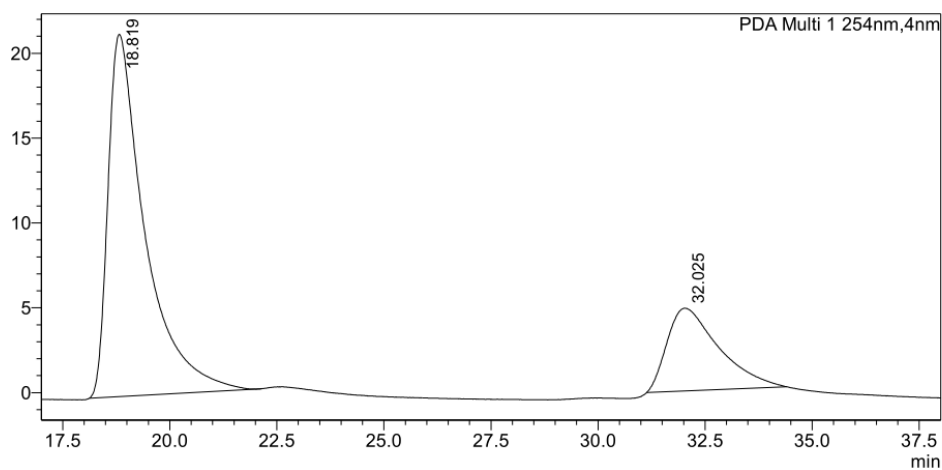

**<Peak Table>**

PDA Ch1 254nm

| Peak# | Ret. Time | Area    | Area%   | Height |
|-------|-----------|---------|---------|--------|
| 1     | 18.819    | 1278886 | 75.774  | 21349  |
| 2     | 32.025    | 408883  | 24.226  | 4873   |
| Total |           | 1687769 | 100.000 | 26222  |



## References

- (1) (a) C. B. Gilley, M. J. Buller, Y. Kobayashi, *Org. Lett.* **2007**, *18*, 3631; (b) Y. Liu, J. Chen, Z. Zhang, J. Qin, M. Zhao, W. Zhang, *Org. Biomol. Chem.*, **2016**, *14*, 7099; (c) S. Yuan, G. Gao, L. Wang, C. Liu, L. Wan, H. Huang, H. Geng, M. Chang. *Nat Comm.*, **2020**, *11*, 621.
- (2) (a) K. S. Levchenko, K. A. Chudov, E. V. Zinoviev, K. A. Lyssenko, D. U. Demin, N. O. Poroshin, P. S. Shmelin, E. P. Grebennikov, K. S. Levchenko *Tetrahedron Lett.* **2018**, *59*, 2788; (b) P. Tong, Z. Sun, S. Wang, Y. Zhang, Y. Li, *J. Org. Chem.* **2019**, *84*, 13967; (c) X. X. Xu, G. T. Wang, X. Zhao, X. K. Jiang, and Z. T. Li, *Soft Matter*, **2010**, *6*, 1246; (d) H. M. Sheldrake, S. Travica, L. Johansson, P. M. Loadman, M. Sutherland, L. Elsalem, N. Illingworth, A. J. Cresswell, T. Reuillon, S. D. Shnyder, S. Mkrtchian, M. Searcey, M. L. Sundberg, L. H. Patterson, and K. Pors, *J. Med. Chem.*, **2013**, *56*, 6273–6277.
